# Title: A global lipid map reveals host dependency factors conserved across SARS-CoV-2 variants

Authors: Scotland E. Farley<sup>1,4</sup>, Jennifer E. Kyle<sup>2</sup>, Hans C. Leier<sup>1</sup>, Lisa M. Bramer<sup>3</sup>, Jules Weinstein<sup>1</sup>, Timothy A. Bates<sup>1</sup>, Joon-Yong Lee<sup>2</sup>, Thomas O. Metz<sup>2</sup>, Carsten Schultz<sup>4</sup>, Fikadu G. Tafesse<sup>1,\*</sup>

## Affiliations:

<sup>1</sup>Department of Molecular Microbiology & Immunology. Oregon Health & Science University; Portland, OR, USA

<sup>2</sup>Biological Sciences Division, Earth and Biological Sciences Directorate. Pacific Northwest National Laboratory (PNNL); Richland, WA, USA

<sup>3</sup>Computational Biology Group, Biological Sciences Division, Earth & Biological Systems Directorate. PNNL; Richland, WA, USA

<sup>4</sup>Department of Chemical Physiology and Biochemistry. Oregon Health & Science University; Portland, OR, USA

\*Corresponding author. Email: tafesse@ohsu.edu

**Abstract:** A comprehensive understanding of host dependency factors for SARS-CoV-2 remains elusive. We mapped alterations in host lipids following SARS-CoV-2 infection using nontargeted lipidomics. We found that SARS-CoV-2 rewires host lipid metabolism, altering 409 lipid species up to 64-fold relative to controls. We correlated these changes with viral protein activity by transfecting human cells with each viral protein and performing lipidomics. We found that lipid droplet plasticity is a key feature of infection and that viral propagation can be blocked by small-molecule glycerolipid biosynthesis inhibitors. We found that this inhibition was effective against the main variants of concern (alpha, beta, gamma, and delta), indicating that glycerolipid biosynthesis is a conserved host dependency factor that supports this evolving virus.

**Main Text:** SARS-CoV-2 interacts with host membranes at every stage of its life cycle. It directly crosses the plasma membrane to enter the cell, replicates inside host-derived membrane compartments, acquires its envelope from the host, and traffics through the Golgi and lysosome to exit the cell. All viruses, by their nature, are wholly dependent on host pathways to meet their metabolic, structural, and trafficking needs, and to be effective, they must modulate these host pathways in some way. One dramatic example of this is the way in which SARS-CoV-2 re-engineers the host internal membranes into double-membraned vesicles (DMVs) and regions of convoluted membrane (CM) to facilitate its replication (1, 2). This general pattern of membrane rearrangements is common among (+)-stranded RNA viruses (3-5), although the specific structures vary by species. In flaviviruses such as Zika virus (6) and dengue virus (7), these large-scale membrane alterations are accompanied by vast and varied changes at the molecular lipid level.

There are many preliminary lines of evidence suggesting that manipulation of host lipids may be a fundamental feature of SARS-CoV-2 infection. Several lipids and lipid-associated proteins have been identified as biomarkers of infection, including VLDL and HDL particles (8), steroid

41 hormones and various apolipoproteins (9), while both elevated triacylglycerol (TAG) (10) and  
42 polyunsaturated free fatty acids (11) have been implicated as markers of severe disease out-  
43 comes. Furthermore, metabolic disorders such as obesity, diabetes, and hypertension have been  
44 described as key risk factors among patients who develop severe disease (12). These observa-  
45 tions indicate systemic changes in lipid metabolism at an organismal level, but it is still unknown  
46 how the virus alters the host lipid metabolism at a cellular level, and how these changes support  
47 the viral life cycle.

48 We hypothesized that SARS-CoV-2 would reprogram host lipid biosynthesis, and that the virus  
49 would depend on specific host metabolic pathways to survive and replicate effectively. To obtain  
50 a comprehensive understanding of how SARS-CoV-2 remodels the cellular lipid composition,  
51 we performed a detailed lipid survey of both infected cells and cells ectopically expressing indi-  
52 vidual SARS-CoV-2 proteins, assessing changes in host lipid composition as a result of infection  
53 and as a result of the activity of specific viral proteins. Based on our initial results, we examined  
54 lipid droplet flux during infection, and further interrogated the requirements for specific host li-  
55 pids using small-molecule inhibitors of glycerolipid biosynthesis in multiple strains of SARS-  
56 CoV-2.

57

## 58 **Lipidomics of SARS-CoV-2 infected human cells**

59 We performed global lipidomic profiling of HEK293T cells overexpressing the ACE2 protein,  
60 which we infected with SARS-CoV-2 or mock-infected for 24 hours (Fig 1A). Each condition  
61 was repeated in biological quintuplicate. Total cellular lipids were extracted following the  
62 method of Bligh-Dyer (13) and analyzed by liquid chromatograph electrospray ionization tan-  
63 dem mass spectrometry (LC-ESI-MS/MS). The abundances of the identified lipids were normal-  
64 ized by comparison to internal standards for quantitative analysis. In total, we identified 514  
65 unique lipids spanning the glycerolipid, phospholipid, sphingolipid, and acylcarnitine categories  
66 (Supplementary Data 1). Of these, 409 (79.6%) were statistically altered between SARS-CoV-2  
67 and mock infection (Benjamini-Hochberg adjusted  $p < 0.05$ , analysis of variance [ANOVA]  
68 test), changing between 2- and 64-fold in response to infection. Principal component analysis  
69 (PCA) of these observations confirmed that infection status accounted for most of the changes  
70 (Fig 1B), with the five infected samples and the five mock samples falling into two distinct  
71 groups.

72 We then examined how these changes in host lipid composition broke down based on class and  
73 acyl chain. Glycerolipids and phospholipids showed the largest and most significant changes  
74 (Fig 1C and Fig S1), with increasing triacylglycerol (TAG) and decreasing cardiolipin (CL) be-  
75 ing the most altered. Examining the nature of the individual lipid species that changed in more  
76 detail (Fig 1C), we observed that the TAG species change based on their fatty acid composition.  
77 TAG species that bear polyunsaturated fatty acid (PUFA) chains were increased an average of 8-  
78 fold more than saturated or monounsaturated species. This trend was also observed in phospho-  
79 lipids: saturated phospholipids (phosphatidylcholine, PC; phosphatidylethanolamine, PE; phos-  
80 phatidylglycerol, PG; phosphatidylinositol PI) almost universally decreased, while many polyun-  
81 saturated species increased, notably P-PC (phosphatidylcholine, plasmalogen-linked) by 2.7-fold  
82 , PC by 1.5-fold, and PG by 1.7-fold. Other notable phenotypes included a decrease in lysolipids  
83 (Lyso-PE by 5.1-fold and Lyso-PC by 3.1 fold), a decrease in CL by 5.9-fold, and an increase in  
84 ceramide (Cer) by 1.8-fold.

85

## 86 **Lipidomics of human cells ectopically expressing SARS-CoV-2 proteins**

87 The genome of SARS-CoV-2 encodes 29 individual proteins (Fig 2A). Some of these proteins  
88 have been directly studied for SARS-CoV-2, but the roles of most of them must be extrapolated  
89 by comparison with the proteins of SARS-CoV, which are better studied. Several SARS-CoV  
90 proteins directly manipulate cellular membranes — nsp3, nsp4, and nsp6 together are known to  
91 induce DMVs (14) and CMs (15, 16) characteristic of coronavirus infection (17, 18), and orf6  
92 (19) also has a dramatic membrane-bending phenotype. Some proteins of SARS-CoV-2 —  
93 nsp1, nsp8, nsp9, nsp16 — have direct effects on mRNA splicing, or protein expression and  
94 membrane integration (20). Many proteins of both viruses contain transmembrane domains (nsp2  
95 (21), orf7a (22), orf7b (23), orf3a (24, 25)) or lipid binding pockets (orf9b (26)) of unknown  
96 function, and many others, including nsp3 (27), nsp6 (28), orf3a (29, 30), orf6 (31), and orf7a  
97 (32)— mediate cell distress pathways such as apoptosis, autophagy, and the unfolded protein re-  
98 sponse (UPR), which are all known to alter cellular lipid composition (33-35) (Fig 2B).

99 To assess how each SARS-CoV-2 protein affects host lipid metabolism, we performed untar-  
100 geted lipidomic profiling of cells transfected with each viral protein, expressed in the PLVX vec-  
101 tor with a C-terminal Strep tag. We optimized the expression of each protein in HEK-293T cells,  
102 measuring transfection efficiency by immunofluorescence of the Strep tag (Fig S2). In order to  
103 make meaningful comparisons between these conditions, high transfection efficiency was re-  
104 quired (> 70%). Despite our efforts, this level of efficiency was not achieved for five proteins  
105 (nsp3, nsp14, nsp15, nsp16, orf3b); therefore, we continued on with the remaining 24. Each viral  
106 protein, as well as the PLVX empty vector, was used to transfect 6-cm dishes of HEK293T cells,  
107 in biological quintuplicate. After 48 hours of transfection, total cellular lipids were extracted fol-  
108 lowing the method of Bligh-Dyer19 and analyzed by liquid chromatography electrospray ioniza-  
109 tion tandem mass spectrometry (LC-ESI-MS/MS) (Fig 2C). The abundances of the identified li-  
110 pids were normalized by comparison to internal standards for quantitative analysis. In total, we  
111 identified 396 unique lipids spanning the glycerolipid, phospholipid, sphingolipid, and acyl-  
112 carnitine categories (Supplementary Data 2). Of these, 317 (80%) were significantly changed in  
113 at least one transfection (Benjamini-Hochberg adjusted  $p < 0.05$ , ANOVA).

114 For the samples transfected with viral proteins, we performed an EASE (Expression Analysis  
115 Systematic Explorer) score enrichment test of statistically significant lipids using Lipid Mini-  
116 On41. Lipid Mini-On performs enrichment analyses of lipidomics data using a text-mining pro-  
117 cess that bins individual lipid names into multiple lipid ontology groups based on their classifica-  
118 tion42 and other characteristics, such as chain length and number of double bonds. Using Lipid  
119 Mini-On we found that the most common enrichments that were increased with the viral protein  
120 transfections were PIs, (elevated in 21 of 28 transfections), diacylglycerols (DAGs) (12 transfec-  
121 tions), and ether-linked lipids, in particular vinyl-ether phosphatidylcholines (O-PC) (10-12  
122 transfections), Cer (10 transfections), and TAG (6 transfections). Enrichments that were found to  
123 be decreased were Lyso-PC (decreased in 21 transfections), CLs (12 transfections), which almost  
124 universally decrease in abundance, and TAGs (decreased in 14 transfections). (Summarized in  
125 Fig 2, D-F; fold changes for all significant lipids are shown in Fig S3.) The 24 viral proteins  
126 studied show a wide variety of lipid alterations, suggesting that SARS-CoV-2 influences host li-  
127 pid metabolism in diverse ways through multiple molecular mechanisms.

128

## 129 **Correlating live virus and viral protein lipidomic phenotypes**

130 With two substantial datasets of virus-induced lipid changes, we sought to link the changes ob-  
131 served in live virus infection to the action of specific viral proteins. First, we performed unsuper-  
132 vised clustering of the normalized lipid species observed in the protein-transfected dataset by t-  
133 SNE (Fig 3A). While most phospholipids did not cluster substantially, TAG, in particular,  
134 formed distinct clusters, and, in an echo of the live virus phenotype, saturated species and poly-  
135 unsaturated species clustered separately. Of note, two other molecular features of infection  
136 — Cer and CL — also sorted into distinct clusters.

137 The dominant features of lipid remodeling in live virus infection were an increase in TAG, Cer,  
138 and phospholipids bearing polyunsaturated fatty acyl chains; and a decrease in lysolipids, DAG,  
139 CL, and saturated phospholipids (Fig 3B). In order to assess each viral protein for its ability to  
140 produce these changes, the average fold change for each of these classes was calculated for each  
141 condition (Fig 3C). Once again we saw that the virus has multiple proteins that influence remod-  
142 eling of the lipid environment of its host cells, suggesting a distinct role for each viral protein.  
143 Each feature of infection was recapitulated by at least one protein, and different proteins appear  
144 to be responsible for different aspects of the live virus lipid phenotype.

145 In particular, TAG increase was recapitulated by six proteins (orf6, nsp13, nsp5, orf9c, nsp1, and  
146 nsp11). Cer increase was recapitulated by six as well (nsp6, orf6, nsp5, orf9c, orf3a, and orf7a),  
147 and polyunsaturated PC (both ether- and ester-linked) increase was recapitulated by four (orf6,  
148 orf9c, orf9b, and E). Of note, orf6 and orf9c recapitulated all three of these distinctive altera-  
149 tions, and also recapitulated the most individual phenotypes of any protein.

150

## 151 **Lipid droplet dynamics in SARS-CoV-2 infection**

152 TAG is the most significantly and the most substantially increased lipid in response to viral in-  
153 fection. TAG is produced through the acylation of DAG by DGAT1 or DGAT2, where it is then  
154 sequestered in lipid droplets that can be accessed as a source of fatty acids. TAG breakdown is  
155 the result of several lipases that remove an acyl chain to produce DAG (Fig 4A). Lipid droplets  
156 (LDs) are the cellular reservoir for TAGs, and have well-established roles in the life cycles of  
157 other viruses. Hepatitis C virus (HCV) and rotaviruses both cause LDs to accumulate during in-  
158 fection, and HCV uses LDs as the site of viral assembly while rotavirus replication occurs in  
159 close proximity to lipid droplets (36, 37). Dengue virus, meanwhile, consumes host lipid droplets  
160 and appears to use them as a source for beta-oxidation (38).

161 We sought to understand how the abundance and morphology of host lipid droplets changes dur-  
162 ing the course of SARS-CoV-2 infection, and whether they are associated with virus-induced  
163 membrane structures. We chose BODIPY 493/503, a bright, hydrophobic dye, to mark the lipid  
164 droplets, a well-established method(39). We also used an anti-dsRNA antibody to mark the sites  
165 of viral replication; dsRNA is an intermediate in the synthesis of the virus's RNA genome, and  
166 has been shown to localize to DMVs(14). We visualized both of these markers 8 hours, 24 hours,  
167 or 48 hours post infection in HEK-293T cells and then stained with BODIPY 493/503 to mark  
168 lipid droplets and an anti-dsRNA antibody to mark the site of viral replication (Fig 4B). We see a  
169 clear increase in the number and size of lipid droplets in a time-dependent manner over the  
170 course of infection, quantified in Fig 4C-D. Lipid droplets per cell increase from zero at 8hpi, to  
171 an average of 6.7 at 24hpi, to an average of 21.5 at 48hpi. Lipid droplet area increases from zero  
172 pixels per droplet at 8hpi, to an average of 177 pixels per droplet at 24hpi, to an average of 400  
173 pixels per droplet at 48hpi. However, there does not appear to be any colocalization of the lipid

174 droplets and dsRNA, suggesting that the virus is not using lipid droplets directly as a platform  
175 for replication (Fig 4E).

176 To further validate these observations, similar experiments were performed in the human epithe-  
177 lial Caco2 cell line. Here, a slight increase in lipid droplet number was observed, from an aver-  
178 age of 8 lipid droplets per cell at 8 and 24hpi, to an average of 15.9 lipid droplets per cell at  
179 48hpi, although the increase was not significant. Lipid droplet area, however, did significantly  
180 increase throughout the course of infection, to a similar degree as in HEK293T-ACE2 cells, from  
181 an average of 136.5 pixels per droplet at 8hpi to an average of 192.5 pixels per droplet at 24hpi  
182 to an average of 431.1 pixels per droplet at 48hpi (Fig 4F-G). Once again, colocalization with  
183 dsRNA was not observed (Fig 4H).

184

### 185 **Viral requirements for central glycerolipid metabolism**

186 Since levels of individual glycerolipid species as well as glycerolipid-based structures were al-  
187 tered by infection, we asked whether these pathways are necessary for viral proliferation. We se-  
188 lected an array of commercially available small molecule inhibitors of lipid synthesis, focusing  
189 on inhibitors of de novo neutral lipid synthesis as well as lipolytic enzymes of lipid recycling  
190 (Fig 5A-F). We performed initial cytotoxicity measurements using a resazurin-based viability as-  
191 say (40) (Fig S4) and selected a non-cytotoxic concentration of each compound to screen for in-  
192 hibition of viral infection. 293T-ACE2 cells were treated overnight with each compound, and  
193 then infected with SARS-CoV-2. After 48 hours of infection, culture supernatants were collected  
194 and the amount of infectious virus produced in the presence of each compound was quantified by  
195 focus forming assay (41).

196 This screen revealed several steps of lipid biosynthesis which are essential to the production of  
197 infectious virions. De novo fatty acid synthesis appeared critical, as GSK2194069, an inhibitor of  
198 fatty acid synthase (FASN) (42), as well as orlistat, a nonspecific lipase inhibitor and inhibitor of  
199 fatty acid synthetase FASN (43, 44), an FDA-approved drug, both completely blocked viral pro-  
200 duction (Fig 5C, D). TAG synthesis and lipolysis are both required, as PF-04620110, an inhibitor  
201 of DGAT1 (45), Orlistat, and CAY10499, which is a non-specific lipase inhibitor (46, 47), all  
202 blocked infection (Fig 5E, D, B). Atglistatin (48), which specifically blocks adipose triacylglyc-  
203 erol lipase, partially inhibited viral production (Fig 5A), suggesting that broad-spectrum lipase  
204 inhibition is more effective than inhibiting only one lipase. The importance of DAG production  
205 to the virus, perhaps as a precursor to TAG, is indicated by the efficacy of U-73122 (Fig 5F),  
206 which inhibits phospholipase-C-dependent processes (49).

207 To directly compare the inhibitors of central glycerolipid metabolism, we designed a more de-  
208 tailed study to test a range of concentrations for each inhibitor. We tested a range of two-fold di-  
209 lutions of each compound, and in parallel with the focus-forming assay to assess viral replica-  
210 tion, we performed a resazurin-based cytotoxicity assay to verify that any deficiency in viral pro-  
211 duction was not due to impaired cell viability (Fig S4). The most effective inhibitor by about  
212 fifty-fold was GSK2194069 ( $EC_{50} = 1.8$  nM, 293T-ACE2). GSK2194069 blocks FASN, sug-  
213 gesting that de novo lipid synthesis is strictly required for viral survival. Orlistat followed in effi-  
214 cacy ( $EC_{50} = 94$  nM, 293T-ACE2), highlighting the importance of both fatty acid synthesis and  
215 lipolysis to the virus. The other broad-spectrum lipase inhibitor, CAY10499 ( $EC_{50} = 157$  nM,  
216 283T-ACE2) had a similar efficacy to PF04620110 ( $EC_{50} = 490$  nM, 293T-ACE2). Atglistatin,  
217 the most specific lipase inhibitor, became cytotoxic before complete inhibition was achieved, and

218 so an EC<sub>50</sub> could not be calculated; certainly it is higher than 10  $\mu$ M, showing again that the vi-  
219 rus is not dependent on the activity of one specific lipase, but rather on a certain lipid composi-  
220 tion. Taken together, these results indicate a profound dependence on host lipid metabolism, and  
221 in particular glycerolipid flux. The de novo synthesis of TAG is required, as is the ability to re-  
222 lease the fatty acids sequestered in this neutral storage lipid through lipolysis.

## 223 224 **Glycerolipid biosynthesis is a conserved host dependency factor for variants of SARS-CoV-** 225 **2**

226 Given that our most effective inhibitors all relate in some way to the dynamics of TAG produc-  
227 tion, we hypothesized that their efficacy is due to the virus's specific requirements for lipid drop-  
228 lets. We performed microscopy of cells treated with selected inhibitors at 10  $\mu$ M overnight (Fig  
229 6A, quantified in Fig 6B, experimental scheme in Fig S5A). We once again observed that virus  
230 alone induced a significant increase in the number of lipid droplets per cell, from an average of  
231 0.3 to average of 3, and further noted that in the absence of virus, none of the inhibitors had an  
232 effect on lipid droplet numbers. In the presence of virus, GSK2194069 treatment did not prevent  
233 a statistically-significant increase in lipid droplet numbers, while PF04620110 did, suggesting  
234 that DGAT1 is essential for virus-induced lipid droplet production. Orlistat, meanwhile, resulted  
235 in an increase in lipid droplet numbers relative to vehicle treatment during infection, from an av-  
236 erage of 3 to an average of 7.5. These results underscore the specificity of SARS-CoV-2's re-  
237 quirements for lipid droplets: while SARS-CoV-2 infection results in an overall increase in the  
238 lipid droplets in each infected cell, both TAG synthesis and lipolysis are required to support the  
239 production of infectious virions. Furthermore, simply increasing the number of lipid droplets  
240 does not support replication: pure accumulation of TAG resulting from the inhibition of lipolysis  
241 is as detrimental to infection as preventing its synthesis.

242 SARS-CoV-2 interacts with host lipids at every stage of its life cycle. To rule out the possibility  
243 that glycerolipid metabolism is necessary for the initial attachment and endocytosis of the virus,  
244 we performed an entry assay using S-pseudotyped lentivirus. For this experiment, lentiviruses  
245 were generated that display the SARS-CoV-2 S protein and carry a GFP reporter; lentiviruses  
246 coated instead with the VSV G protein were used as a control. Successfully infected cells express  
247 GFP, and quantitative microscopy was used to assess infection (Fig S5B). 293T-ACE2 cells  
248 were treated overnight with selected inhibitors of glycerolipid biosynthesis and then infected  
249 with either of these two lentivirus constructs. We did not observe a significant reduction in viral  
250 entry in the presence of any of the inhibitors tested, suggesting that the virus depends upon this  
251 lipid biosynthetic pathway to facilitate the intracellular stages of its life cycle (Fig 6C).

252 The continued global transmission of SARS-CoV-2 has led to the emergence of variants of con-  
253 cern (VOC) that show evidence of increased transmissibility (50) or resistance to prior immunity  
254 (51, 52) (Fig 6D). The major VOCs include the B.1.1.7 (also called the alpha variant), first iden-  
255 tified in southeast England in November 2020 (53); B.1.351 (beta variant), identified in Novem-  
256 ber 2020 in South Africa (54); P.1 (gamma variant), identified in December 2020 in Brazil (55);  
257 and B.1.617.2 (delta variant), identified in October 2020 in India (56). Several recent studies  
258 have shown that these strains escape neutralization of serum antibodies collected from individu-  
259 als that received COVID-19 vaccine or were previously infected. Most of the mutations in the  
260 emerging VOCs are on the spike protein, and while there are some reported alterations in non-  
261 structural proteins, mutations that fundamentally perturb the virus's ability to manipulate host

262 pathways likely come with a quite high fitness cost. We hypothesized, therefore, that the replica-  
263 tion of the variants of SARS-CoV-2 is inhibited to a similar degree to the original  
264 USA/WA1/2020 strain.

265 To test if the small molecules that inhibit glycerolipid biosynthetic machinery are broadly effica-  
266 cious, we used the P.1, B.1.351, B.1.1.7, and B.1.617.2 strains, as well as the WA1 original  
267 strain, to infect cells that had been pre-treated overnight with 10  $\mu$ M CAY10499, GSK2194069,  
268 PF04620110, and Orlistat, and assessed viral proliferation by focus forming assay. We per-  
269 formed these experiments in both 293T-ACE2 cells and Caco2 cells. We observed very few dif-  
270 ferences in efficacy of the compounds among the four strains tested (Figure 6E and Fig S6).  
271 GSK2194069 and Orlistat comprehensively block infection (< 5% of vehicle treatment) in both  
272 cell types and all five strains. CAY10499 has slightly different efficacies between the two cell  
273 lines, (~ 5-10% infection in HEK293T-ACE2, ~ 30% infection in Caco2), but there is no statisti-  
274 cal difference between the variants within each cell line. PF04620110 resembles CAY10499 in  
275 Caco2 cells; in HEK293T cells, PF04620110 shows reduced efficacy against the P.1 strain. In  
276 the delta strain, CAY10499 showed a slightly significant reduction in foci in Caco2 cells ( $p =$   
277 0.045), from ~ 30% infection in WA to ~ 5% infection in delta; no other inhibitors were signifi-  
278 cantly different. Overall, these results show an encouraging conservation of inhibitor efficacy  
279 against the four variants of concern in two cell lines.

280

## 281 Discussion

282 Based on our integrated lipidomics, microscopy and small-molecule inhibition experiments, we  
283 propose here a model for how SARS-CoV-2 uses lipid droplets to support infection (Figure 6F).  
284 We show that lipid droplet proliferation is a consequence of infection, and that both TAG synthe-  
285 sis and lipolysis are required for effective replication. The lipid droplet phenotype appears to be  
286 part of a profound reprogramming of cellular lipid metabolism which is induced directly by indi-  
287 vidual viral proteins; strikingly, polyunsaturated lipids are dramatically increased while saturated  
288 lipids are decreased, suggesting that viral membrane structures require a particularly high level  
289 of fluidity. While lipid droplets do not appear to be parts of the viral replication complex, given  
290 the very low levels of colocalization between dsRNA and BODIPY in infected cells, it seems  
291 likely that their roles in buffering lipid levels and facilitating membrane plasticity support the  
292 ambitious coronaviral membrane rearrangements.

293 Using small-molecule inhibitors of glycerolipid metabolism, we showed that SARS-CoV-2 fun-  
294 damentally requires host lipid metabolic pathways for its survival and proliferation. Our findings  
295 highlight the dynamic and specific involvement of host lipids in infection: SARS-CoV-2 requires  
296 both de novo fatty acid and TAG synthesis, and lipolysis, simultaneously promoting lipid synthe-  
297 sis and providing specific lipids for viral processes. We further showed that these inhibitors work  
298 as effectively against the recently emerging SARS-CoV-2 variants of concern as they do against  
299 the original WA1 strain, demonstrating the advantage of designing host-targeted therapeutics  
300 against a conserved host dependency pathway.

301 Our findings fill an important gap in our understanding of host dependency factors of corona-  
302 virus infection. Our systematic analysis of the protein-by-protein effect on host lipids reveals a  
303 complex network of many individual viral proteins responsible for diverse aspects of host lipid  
304 remodeling. Both of our lipidomics datasets are resources for understanding cellular disease pa-  
305 thology and suggest potential directions for therapeutic discovery, highlighted by the success of

306 several inhibitors of glycerolipid biosynthesis in blocking viral replication. In light of the evol-  
307 ving nature of SARS-CoV-2, it is critical that we understand the basic biology of its life cycle in  
308 order to illuminate additional avenues for protection and therapy against this global pandemic  
309 pathogen, which spreads quickly and mutates with ease.

## 310 **Materials and Methods**

### 311 Materials

#### 312 Cell lines

313 Cell lines (HEK293T, HEK293T-ACE2, Vero-E6, and Caco2) were obtained from ATCC.

314

#### 315 Viral strains

316 SARS-CoV-2 viral strains (isolate USA-WA1/2020: Identifier #NR-52281; isolate  
317 USA/CA CDC 5574/2020: Identifier #NR-54011; isolate hCoV-19/South Africa/KRISP-  
318 K005325/2020: Identifier #NR-54009; hCoV-19/Japan/TY7-503/2021: Identifier #NR54982;  
319 isolate hCoV-19/USA/PHC658/2021: Identifier # NR-55611) were obtained from BEI resources  
320 and propagated in Vero E6 cells.

321

#### 322 Recombinant DNA

323 Plasmids containing strep-tagged SARS-CoV-2 proteins were obtained from the Krogon lab at  
324 UCSF (59).

325

#### 326 Chemicals and antibodies

327 Inhibitors of lipid biosynthesis were obtained from Cayman Chemical; EquiSPLASH lipidomics  
328 internal standard was obtained from Avanti Polar Lipids. Anti-dsRNA antibody was obtained  
329 from Millipore (identifier MABE1134); anti-mouse IgG AlexaFluor 647 was obtained from Invi-  
330 trogen (Identifier A32628); anti-llama secondary HRP, goat IgG was obtained from Novus (iden-  
331 tifier NB7242).

332

### 333 Methods

#### 334 Cell culture

335 Unless otherwise stated, cells were maintained at all times in standard tissue culture-treated ves-  
336 sels in DMEM supplemented with 1% nonessential amino acids and 1% penicillin-streptomycin  
337 at 37 °C and 5% CO<sub>2</sub>. Media for Vero-E6 cells, 293T (wt) and 293T-ACE2 cells was supple-  
338 mented with 10% FBS while media for Caco2 cells was supplemented with 20% FBS.

339

#### 340 SARS-CoV-2 growth and titration

341 All SARS-CoV-2 isolates were obtained from BEI resources: USA/WA1/2020 (NR-52281),  
342 USA/CA CDC 5574/2020 [lineage B.1.1.7] (NR-54011), hCoV-19/South Africa/KRISP-  
343 K005325/2020 [lineage B.1.351] (NR-54009), hCoV-19/Japan/TY7-503/2021 [linage P.1] (NR-  
344 54982), hCoV-19/USA/PHC658/2021 [lineage B.1.617.2] (NR-55611). Unless otherwise stated,  
345 infection assays were performed with USA-WA1/2020. To propagate each virus strain, sub-con-  
346 fluent monolayers of Vero E6 cells were inoculated with the clinical isolates (MOI < 0.01) and  
347 grown for 72 h, at which time significant cytopathic effect was observed for all strains. Culture  
348 supernatants were removed, centrifuged 10 min at 1,000 x g, and stored in aliquots at -80°C. To  
349 determine titer, focus forming assays were performed on the culture supernatant (assay described  
350 in detail below). Substantial differences were noted in the focus phenotypes of these five strains.

351



352 *Lipidomics — Infection*

353 293T-ACE2 cells were seeded at 70% cell density and allowed to grow overnight. Cells were  
354 then inoculated with USA-WA1/2020 (MOI = 5) for 1 hr at 37°C in 2% FBS DMEM, rocking  
355 gently every 15 minutes. After 1 hr, infection media was removed and replaced with normal 10%  
356 DMEM. Cellular lipids were extracted 24 hr after infection.

357

358 *Lipidomics — Transfection*

359 Plasmids containing Strep-tagged viral proteins were generously provided by the Krogan lab at  
360 UCSF, and have been described previously (59). Wild-type 293T cells were seeded in 6cm  
361 dishes and transfected with varying amounts viral plasmids (based on optimal expression for  
362 each plasmid, see Table S1), as well as a PLVX empty vector control, using Lipofectamine 3000  
363 (ThermoFisher Scientific) as per manufacturer's instructions. Transfection media was carefully  
364 removed 6 hours after addition and replaced with DMEM. Each condition was repeated in bio-  
365 logical quintuplicate. Cellular lipids were extracted 48 hr after transfection.

366

367 *Lipidomics — Lipid Extraction*

368 Cells were washed with PBS and resuspended in a 2 : 1 : 0.75 mixture of chloroform : methanol :  
369 water, and 10 µL of an internal standard cocktail (Avanti EquiSPLASH) was added. Extracts  
370 were left for one hour at 4 °C, then the layers were separated by centrifugation (3,000xg for 10  
371 minutes), and the chloroform layer was moved to a fresh tube. 2 mL fresh chloroform was added  
372 to the aqueous layer, mixed, left for one hour at 4 °C, separated by centrifugation, and then added  
373 to the first chloroform layer. The combined chloroform layers were dried under a stream of nitro-  
374 gen. These dried extracts were frozen at -80 °C and sent to PNNL on dry ice.

375

376 *Lipidomics — LC-MS/MS analysis and lipid identification*

377 LC-MS/MS parameters were established and identifications were conducted as previously de-  
378 scribed (60). A Waters Aquity UPLS H class system interfaced with a Velos-ETD Orbitrap mass  
379 spectrometer was used for LC-ESI-MS/MS analyses. Briefly, lipid extracts were dried under vac-  
380 uum, dissolved in a solution of 10 µL chloroform plus 540 µL of methanol, and 10 µL were in-  
381 jected onto a reverse-phase Waters CSH column (3.0 mmx 150 mm x 1.7 µm particle size), and  
382 lipids were separated over a 34-minute gradient (mobile phase A: ACN/H<sub>2</sub>O (40:60) containing  
383 10 mM ammonium acetate; mobile phase B: ACN/IPA (10:90) containing 10 mM ammonium  
384 acetate) at a flow rate of 250 µL/min. Samples were analyzed in both positive and negative  
385 mode, using higher-energy collision dissociation and collision-induced dissociation to induce  
386 fragmentation. Lipid identifications were made using previously outlined fragment ions (60).  
387 The LC-MS/MS raw data files were analyzed using LIQUID (60), and then all identifications  
388 were manually validated by examining the fragmentation spectra for diagnostic and fragment  
389 ions corresponding to lipid acyl chains. Identifications were further validated by examining the  
390 precursor ion isotopic profile and mass measurement error, extracted ion chromatogram, and re-  
391 tention time for each identified lipid species. To facilitate quantification of lipids, a reference da-  
392 tabase for lipids identified from the MS/MS data was created, and features from each analysis  
393 were then aligned to the reference database based on their m/z, and retention time using MZmine  
394 2 (61). Aligned features were manually verified, and peak apex-intensity values were reported  
395 for statistical analysis.

396

397 *Lipidomics — QC, normalization, and statistical comparison methods*

398 Lipidomics data were collected in positive and negative ionization mode and analyzed using R.  
399 Each ionization mode datasets was normalized using an IS specific to the respective ionization

400 mode. We required that an IS be quantified for every sample to be considered for normalization  
401 purposes. Further, normalization factors should not be related to the biological groups being  
402 compared to avoid the potential introduction of bias into the data. Thus, for each ionization  
403 mode, we evaluated all IS normalization candidates and 1) conducted a test for a difference in  
404 mean normalization factors (IS values) by group (Mock vs Virus) and 2) calculated the coeffi-  
405 cient of variation (CV) of IS values. The IS showing no evidence of a difference in values by  
406 group (p-value > 0.5) and with the minimum CV was selected for normalization. The IS ‘15:0-  
407 18:1(d7) PC\_IS’ was selected based on the above criteria for both positive and negative ioniza-  
408 tion data and was used as the normalization factor ( $\log_2(\text{abundance}/\text{IS abundance})$ ) in both da-  
409 taset, with a mean CV of 25.8% over the two ionization mode datasets. A one-way analysis of  
410 variance (ANOVA) was run on each lipid. The resulting p-values were adjusted for multiple  
411 comparisons within each lipid using the Benjamini-Hochberg multiple test correction (62).

412

#### 413 *Lipid droplet immunofluorescence — Infection*

414 293T-ACE2 or Caco2 cells were seeded at 70% cell density in 24-well plates and allowed to  
415 grow overnight. Cells were then inoculated with USA-WA1/2020 (MOI = 1) for 1 hr at 37°C in  
416 2% FBS DMEM, rocking gently every 15 minutes. After 1 hr, infection media was removed and  
417 replaced with normal 10% DMEM (or 20% DMEM, for Caco2 cells). Cells were fixed 8 hours,  
418 24 hours, or 48 hours after infection in 4% PFA.

419

#### 420 *Lipid droplet immunofluorescence — Imaging*

421 After fixation, cells were washed three times with PBS, permeabilized with 0.01% digitonin in  
422 PBS for thirty minutes, and blocked with 5% Normal Goat Serum in PBS. Cells were stained  
423 overnight with an anti-dsRNA antibody diluted 1:50 in blocking buffer. Cells were washed three  
424 times with PBS and then stained with an A647 secondary antibody for 1 hr. Cells were then  
425 stained with 1 µg/mL BODIPY 493/503 in PBS for 15 minutes, and then 1x DAPI for 10  
426 minutes. Cells were imaged on a Zeiss LSM 980 Laser-Scanning 3-channel confocal microscope  
427 with Airyscan.2.

428

#### 429 *Lipid droplet immunofluorescence — Image analysis*

430 Pearson’s correlation coefficients were measured from 2D projections of z-stacks in Cellprofiler  
431 (63). Lipid were counted and their sizes, in number of pixels, were measured, using a Cellpro-  
432 filer pipeline.

433

#### 434 *Cytotoxicity screening*

435 293T-ACE2 and Caco2 cells were seeded in 96-well plates. The next day they were treated with  
436 six 5-fold dilutions of each compound, starting from 50 µM. Each condition was tested in tripli-  
437 cate. After 72 hours of compound treatment, cytotoxicity was assessed using resazurin, which is  
438 converted into fluorescent resarufin by cells with active oxidative metabolism (65). Resazurin  
439 was added to a concentration of 0.15 mg/mL and cells were left at 37 °C for 4 hours, and then  
440 fluorescence intensity was measured using a BMG CLARIOstar fluorescence plate reader with  
441 560 nm excitation/590 nm emission.

442

#### 443 *Single concentration screen for replication inhibition (all strains of SARS-CoV-2)*

444 The highest concentration for each inhibitor that did not cause cytotoxicity was selected for this  
445 assay. For most described inhibitors 10 µM was used, except for MAF (100 µM), and remdesivir  
446 (2 µM). Each cell line (Caco2 or 293T-ACE2) was seeded in 96-well plates at a density of  
447 10,000 cells per well and treated overnight with each inhibitor prior to infection with SARS-

448 CoV-2 with an MOI of 0.1. The infection was continued for 48 hours. To quantify viral produc-  
449 tion, focus-forming assays were performed on the supernatants, described in detail below.

450

#### 451 *Pseudovirus lentivirus production*

452 293T cells were seeded at 2 million cells/dish in 6cm TC-treated dishes. The following day, cells  
453 were transfected as described above with lentivirus packaging plasmids, SARS-CoV-2 S plas-  
454 mid, and IzGreen reporter plasmid (66). After transfection, cells were incubated at 37 °C for 60  
455 hours. Viral media was harvested, filtered with a 0.45 µm filter, then frozen before use. Virus  
456 transduction capability was then determined by fluorescence using a BZ-X700 all-in-one fluores-  
457 cent microscope (Keyence), and a 1:16 dilution of viral stocks was found to be optimal for neu-  
458 tralization assays.

459

#### 460 *Pseudovirus entry assay*

461 Neutralization protocol was based on previously reported experiments with the SARS-CoV-2 S  
462 pseudotyped lentivirus (66). 293T-ACE2 cells were seeded on tissue-culture-treated, poly-lysine  
463 treated 96-well plates at a density of 10,000 cells per well. Cells were allowed to grow overnight  
464 at 37 °C, and then treated with selected inhibitors as described above for live virus infection. Lz-  
465 Green SARS-CoV-2 S pseudotyped lentivirus was added to 293T-ACE2 cells treated with 5  
466 µg/mL polybrene and incubated for 48 hours before imaging. Cells were fixed with 4 % PFA for  
467 1 hour at room temperature, incubated with DAPI for 10 minutes at room temperature, and im-  
468 aged with BZ-X700 all-in-one fluorescent microscope (Keyence). Estimated area of DAPI and  
469 GFP fluorescent pixels was calculated with built-in BZ-X software (Keyence). There were five  
470 biological replicates for each condition, and the biggest outlier was removed from analysis due to  
471 inherent variability in the assay.

472

#### 473 *Measurement of compound EC<sub>50</sub>*

474 Compounds from the single concentration screen that showed efficacy against SARS-CoV-2 rep-  
475 lication were tested to measure compound EC<sub>50</sub>. The cell line of interest (293T-ACE2 or Caco2)  
476 was seeded in 96-well plates at a density of 10,000 cells per well, and treated overnight with 2-  
477 fold dilutions of each compound, starting from 50 µM for Atglistatin, PF04620110,  
478 GSK2194069, and CAY10499, and starting at 1 µM for Orlistat. Each condition was tested in  
479 quadruplicate. The next day cells were infected as described above, and the infection was contin-  
480 ued for 48 hours, and then the supernatants were used in a focus forming assay, as described be-  
481 low.

482

#### 483 *Focus forming assay*

484 Vero E6 cells were seeded in a 96-well plate at a density of 20,000 cells per well. The next day,  
485 supernatants from infected Caco2 or 293T-ACE2 cells were diluted by adding 225 µL dilution  
486 media (Opti-MEM, 2% FBS, 1% pen-strep, 1% non-essential amino acids) to a U-bottom 96-  
487 well plate, and then 25 µL of virus-infected supernatant. Further dilutions were made in the same  
488 manner, if so desired. Media from the Vero E6 cells was removed and 25 µL diluted virus was  
489 added to each well. Vero E6 cells were inoculated for 1 hour at 37 °C/5% CO<sub>2</sub> with occasional  
490 rocking. After 1 hour, 125 µL of overlay media (0.01 mg/mL methylcellulose in dilution media)  
491 was added to each well. Plates were incubated at 37 °C for 24 hours. Overlay media was re-  
492 moved, and replaced with 4% PFA. Plate and lid were saturated in 4% PFA for at least 1 hour at  
493 room temperature and removed from the BSL-3. PFA was washed off by gently immersing the  
494 plate in a vat of deionized water. Plates were permeabilized in perm buffer (0.1% saponin, 0.1%  
495 BSA in PBS) for 30 minutes, then incubated with 50 µL primary antibody (alpaca anti-SARS-

496 CoV-2 serum, diluted 1:5,000 in perm buffer) for either 2hr room temperature or overnight at 4  
497 °C. Antibody was removed and plates were washed 3 x 5 minutes with 200 µL/well PBST (0.1%  
498 tween in PBS). Plates were incubated with 50 µL secondary antibody (anti-llama HRP, goat IgG)  
499 for either 2hr room temperature or overnight at 4 °C. Antibody was removed and plates were  
500 washed 3 x 5 minutes with 200 µL/well PBST. Plates were stained with 50 µL/well TrueBlue pe-  
501 roxidase substrate for 30 minutes. Foci were imaged on an ImmunoSpot S6 Macro ELISPOT im-  
502 ager, and then counted using the Viridot R package (67).

503

#### 504 *Quantification and Statistical Analysis*

505 EC<sub>50</sub> values were calculated using the Hill equation in the R software package. Unless otherwise  
506 stated, P values are from one-way ANOVA tests without adjustments for multiple comparisons,  
507 with P < 0.05 considered statistically significant.

508

509 **Data and Code Availability:** The raw lipidomics datasets generated during this study have been  
510 deposited and will be available at <ftp://massive.ucsd.edu/MSV000087944/>. Summaries of fold  
511 change changes and p-values are provided in Supplementary Data 1 (live virus lipidomics) and  
512 Supplementary Data 2 (viral protein lipidomics).

513

## 514 **References:**

- 515
- 516 1. Wolff G, Limpens RWAL, Zevenhoven-Dobbe JC, Laugks U, Zheng S, Jong AWMd, et al. A molecular
- 517 pore spans the double membrane of the coronavirus replication organelle. *Science*. 2020;369:1395-8.
- 518 2. Klein S, Cortese M, Winter SL, Wachsmuth-Melm M, Neufeldt CJ, Cerikan B, et al. SARS-CoV-2 struc-
- 519 ture and replication characterized by in situ cryo-electron tomography. *Nat Commun*. 2020;11(1):5885.
- 520 3. Welsch S, Miller S, Romero-Brey I, Merz A, Bleck CK, Walther P, et al. Composition and three-dimen-
- 521 sional architecture of the dengue virus replication and assembly sites. *Cell Host Microbe*. 2009;5(4):365-75.
- 522 4. Shulla A, Randall G. (+) RNA virus replication compartments: a safe home for (most) viral replication.
- 523 *Curr Opin Microbiol*. 2016;32:82-8.
- 524 5. Cortese M, Goellner S, Acosta EG, Neufeldt CJ, Oleksiuk O, Lampe M, et al. Ultrastructural Characteriza-
- 525 tion of Zika Virus Replication Factories. *Cell Rep*. 2017;18(9):2113-23.
- 526 6. Leier HC, Weinstein JB, Kyle JE, Lee JY, Bramer LM, Stratton KG, et al. A global lipid map defines a net-
- 527 work essential for Zika virus replication. *Nat Commun*. 2020;11(1):3652.
- 528 7. Melo C, Delafiori J, Dabaja MZ, de Oliveira DN, Guerreiro TM, Colombo TE, et al. The role of lipids in
- 529 the inception, maintenance and complications of dengue virus infection. *Sci Rep*. 2018;8(1):11826.
- 530 8. Kimhofer T, Lodge S, Whiley L, Gray N, Loo RL, Lawler NG, et al. Integrative Modeling of Quantitative
- 531 Plasma Lipoprotein, Metabolic, and Amino Acid Data Reveals a Multiorgan Pathological Signature of SARS-CoV-2
- 532 Infection. *J Proteome Res*. 2020;19(11):4442-54.
- 533 9. Shen B, Yi X, Sun Y, Bi X, Du J, Zhang C, et al. Proteomic and Metabolomic Characterization of COVID-
- 534 19 Patient Sera. *Cell*. 2020.
- 535 10. Masana L, Correig E, Ibarretxe D, Anoro E, Arroyo JA, Jerico C, et al. Low HDL and high triglycerides
- 536 predict COVID-19 severity. *Sci Rep*. 2021;11(1):7217.
- 537 11. Nguyen M, Bourredjem A, Piroth L, Bouhemad B, Jalil A, Pallot G, et al. High plasma concentration of
- 538 non-esterified polyunsaturated fatty acids is a specific feature of severe COVID-19 pneumonia. *Sci Rep*.
- 539 2021;11(1):10824.
- 540 12. Richardson S, Hirsch JS, Narasimhan M, Crawford J, McGinn T, Davidson K. Presenting Characteristics,
- 541 Comorbidities, and Outcomes Among 5700 Patients Hospitalized With COVID-19 in the New York City Area.
- 542 *Journal of the American Medical Association*. 2020;323(20):2052-9.
- 543 13. Bligh EG, Dyer WJ. A rapid method of total lipid extraction and purification. *Can J Biochem Physiol*.
- 544 1959;37(8):911-7.
- 545 14. Snijder EJ, Limpens R, de Wilde AH, de Jong AWM, Zevenhoven-Dobbe JC, Maier HJ, et al. A unifying
- 546 structural and functional model of the coronavirus replication organelle: Tracking down RNA synthesis. *PLoS Biol*.
- 547 2020;18(6):e3000715.
- 548 15. Goldsmith CS, Tatti KM, Ksiazek TG, Rollin PE, Comer JA, Lee WW, et al. Ultrastructural Characteriza-
- 549 tion of SARS Coronavirus. *Emerging Infectious Diseases*. 2004;10(2):320-7.
- 550 16. Mohan J, Wollert T. Membrane remodeling by SARS-CoV-2 - double-enveloped viral replication. *Fac*
- 551 *Rev*. 2021;10:17.
- 552 17. Angelini MM, Akhlaghpour M, Neuman BW, Buchmeier MJ. Severe acute respiratory syndrome corona-
- 553 virus nonstructural proteins 3, 4, and 6 induce double-membrane vesicles. *mBio*. 2013;4(4).
- 554 18. Hagemeyer MC, Monastyrska I, Griffith J, van der Sluijs P, Voortman J, van Bergen en Henegouwen PM,
- 555 et al. Membrane rearrangements mediated by coronavirus nonstructural proteins 3 and 4. *Virology*. 2014;458-
- 556 459:125-35.
- 557 19. Zhou H, Ferraro D, Zhao J, Hussain S, Shao J, Trujillo J, et al. The N-terminal region of severe acute res-
- 558 piratory syndrome coronavirus protein 6 induces membrane rearrangement and enhances virus replication. *J Virol*.
- 559 2010;84(7):3542-51.
- 560 20. Banerjee AK, Blanco MR, Bruce EA, Honson DD, Chen LM, Chow A, et al. SARS-CoV-2 Disrupts Splic-
- 561 ing, Translation, and Protein Trafficking to Suppress Host Defenses. *Cell*. 2020.
- 562 21. Angeletti S, Benvenuto D, Bianchi M, Giovanetti M, Pascarella S, Ciccozzi M. COVID-2019: The role of
- 563 the nsp2 and nsp3 in its pathogenesis. *J Med Virol*. 2020.
- 564 22. Nelson CA, Pekosz A, Fremont DH. Structure and Intracellular Targeting of the SARS-Coronavirus Orf7a
- 565 Accessory Protein. *Structure*. 2005;13:75-85.
- 566 23. Schaecher SR, Diamond MS, Pekosz A. The transmembrane domain of the severe acute respiratory syn-
- 567 drome coronavirus ORF7b protein is necessary and sufficient for its retention in the Golgi complex. *J Virol*.
- 568 2008;82(19):9477-91.
- 569 24. Chen CC, Kruger J, Sramala I, Hsu HJ, Henklein P, Chen YM, et al. ORF8a of SARS-CoV forms an ion
- 570 channel: experiments and molecular dynamics simulations. *Biochim Biophys Acta*. 2011;1808(2):572-9.

- 571 25. Bianchi M, Borsetti A, Ciccozzi M, Pascarella S. SARS-Cov-2 ORF3a: Mutability and function. *Int J Biol*  
572 *Macromol.* 2021;170:820-6.
- 573 26. Meier C, Aricescu AR, Assenberg R, Aplin RT, Gilbert RJ, Grimes JM, et al. The crystal structure of ORF-  
574 9b, a lipid binding protein from the SARS coronavirus. *Structure.* 2006;14(7):1157-65.
- 575 27. Chen X, Wang K, Xing Y, Tu J, Yang X, Zhao Q, et al. Coronavirus membrane-associated papain-like pro-  
576 teases induce autophagy through interacting with Beclin1 to negatively regulate antiviral innate immunity. *Protein*  
577 *Cell.* 2014;5(12):912-27.
- 578 28. Cottam EM, Maier HJ, Manifava M, Vaux LC, Chandra-Schoenfelder P, Gerner W, et al. Coronavirus nsp6  
579 proteins generate autophagosomes from the endoplasmic reticulum via an omegasome intermediate. *Autophagy.*  
580 2011;7(11):1335-47.
- 581 29. Yue Y, Nabar NR, Shi CS, Kamenyeva O, Xiao X, Hwang IY, et al. SARS-Coronavirus Open Reading  
582 Frame-3a drives multimodal necrotic cell death. *Cell Death Dis.* 2018;9(9):904.
- 583 30. Ren Y, Shu T, Wu D, Mu J, Wang C, Huang M, et al. The ORF3a protein of SARS-CoV-2 induces apopto-  
584 sis in cells. *Cell Mol Immunol.* 2020;17(8):881-3.
- 585 31. Ye Z, Wong CK, Li P, Xie Y. A SARS-CoV protein, ORF-6, induces caspase-3 mediated, ER stress and  
586 JNK-dependent apoptosis. *Biochim Biophys Acta.* 2008;1780(12):1383-7.
- 587 32. Tan YX, Tan TH, Lee MJ, Tham PY, Gunalan V, Druce J, et al. Induction of apoptosis by the severe acute  
588 respiratory syndrome coronavirus 7a protein is dependent on its interaction with the Bcl-XL protein. *J Virol.*  
589 2007;81(12):6346-55.
- 590 33. Singh R, Kaushik S, Wang Y, Xiang Y, Novak I, Komatsu M, et al. Autophagy regulates lipid metabolism.  
591 *Nature.* 2009;458(7242):1131-5.
- 592 34. Crimi M, Esposti MD. Apoptosis-induced changes in mitochondrial lipids. *Biochim Biophys Acta.*  
593 2011;1813(4):551-7.
- 594 35. Welte MA, Gould AP. Lipid droplet functions beyond energy storage. *Biochim Biophys Acta Mol Cell*  
595 *Biol Lipids.* 2017;1862(10 Pt B):1260-72.
- 596 36. Miyanari Y, Atsuzawa K, Usuda N, Watashi K, Hishiki T, Zayas M, et al. The lipid droplet is an important  
597 organelle for hepatitis C virus production. *Nat Cell Biol.* 2007;9(9):1089-97.
- 598 37. Roingard P, Hourieux C. Hepatitis C virus core protein, lipid droplets and steatosis. *J Viral Hepat.*  
599 2008;15(3):157-64.
- 600 38. Heaton NS, Randall G. Dengue Virus-Induced Autophagy Regulates Lipid Metabolism. *Cell Host & Mi-*  
601 *crobe.* 2010;8:422-32.
- 602 39. Qiu B, Simon MC. BODIPY 493/503 Staining of Neutral Lipid Droplets for Microscopy and Quantifica-  
603 tion by Flow Cytometry. *Bio Protoc.* 2016;6(17).
- 604 40. Kumar P, Nagarajan A, Uchil PD. Analysis of Cell Viability by the alamarBlue Assay. *Cold Spring Harb*  
605 *Protoc.* 2018;2018(6).
- 606 41. Case JB, Bailey AL, Kim AS, Chen RE, Diamond MS. Growth, detection, quantification, and inactivation  
607 of SARS-CoV-2. *Virology.* 2020;548:39-48.
- 608 42. Hardwicke MA, Rendina AR, Williams SP, Moore ML, Wang L, Krueger JA, et al. A human fatty acid  
609 synthase inhibitor binds beta-ketoacyl reductase in the keto-substrate site. *Nat Chem Biol.* 2014;10(9):774-9.
- 610 43. Hadvary P, Lengsfeld H, Wolfer H. Inhibition of pancreatic lipase *in vitro* by the covalent inhibitor tetrahy-  
611 drolipstatin. *Biochem J.* 1988;256:357-61.
- 612 44. Kridel SJ, Axelrod F, Rozenkrantz N, Smith JW. Orlistat Is a Novel Inhibitor of Fatty Acid Synthase with  
613 Antitumor Activity. *Cancer Research.* 2004;64:2070-5.
- 614 45. Dow RL, Li JC, Pence MP, Gibbs EM, LaPerle JL, Litchfield J, et al. Discovery of PF-04620110, a Potent,  
615 Selective, and Orally Bioavailable Inhibitor of DGAT-1. *ACS Med Chem Lett.* 2011;2(5):407-12.
- 616 46. Kraemer FB, Shen W-J. Hormone-sensitive lipase: control of intracellular tri-(di)-acylglycerol and chole-  
617 sterol ester hydrolysis. *Journal of Lipid Research.* 2002;43(10):1585-94.
- 618 47. Muccioli GG, Labar G, Lambert DM. CAY10499, a novel monoglyceride lipase inhibitor evidenced by an  
619 expeditious MGL assay. *Chembiochem.* 2008;9(16):2704-10.
- 620 48. Mayer N, Schweiger M, Romauch M, Grabner GF, Eichmann TO, Fuchs E, et al. Development of small-  
621 molecule inhibitors targeting adipose triglyceride lipase. *Nat Chem Biol.* 2013;9(12):785-7.
- 622 49. Bleasdale JE, Thakur NR, Gremban RS, Bundy GL, Fitzpatrick FA, Smith RJ, et al. Selective Inhibition of  
623 Receptor-Coupled Phospholipase-C-Dependent Processes in Human Platelets and Polymorphonuclear Neutrophils.  
624 *The Journal of Pharmacology and Experimental Therapeutics.* 1990;255(2):756-68.
- 625 50. Graham MS, Sudre CH, May A, Antonelli M, Murray B, Varsavsky T, et al. Changes in symptomatology,  
626 reinfection, and transmissibility associated with the SARS-CoV-2 variant B.1.1.7: an ecological study. *Lancet Pub-*  
627 *lic Health.* 2021;6:e335-45.

- 628 51. Cele S, Gazy I, Jackson L, Hwa SH, Tegally H, Lustig G, et al. Escape of SARS-CoV-2 501Y.V2 from  
629 neutralization by convalescent plasma. *Nature*. 2021;593(7857):142-6.
- 630 52. Wang P, Casner RG, Nair MS, Wang M, Yu J, Cerutti G, et al. Increased resistance of SARS-CoV-2 vari-  
631 ant P.1 to antibody neutralization. *Cell Host Microbe*. 2021;29(5):747-51 e4.
- 632 53. Kupferschmidt K. Fast-spreading U.K. virus variant raises alarms. *Science*. 2021;371(6524):9-10.
- 633 54. Tegally H, Wilkinson E, Giovanetti M, Iranzadeh A, Fonseca V, Giandhari J, et al. Emergence and rapid  
634 spread of a new severe acute respiratory syndrome-related coronavirus 2(SARS-CoV-2) ilneage with multiple spike  
635 mutations in South Africa. medRxiv. 2020.
- 636 55. Faria NR, Mellan TA, Whittaker C, Claro IM, Candido DdS, Mishra S, et al. Genomics and epidemiology  
637 of the P.1 SARS-CoV-2 lineage in Manaus, Brazil. *Science*. 2021;372:815-21.
- 638 56. Liu C, Ginn HM, Dejnirattisai W, Supasa P, Wang B, Tuekprakhon A, et al. Reduced neutralization of  
639 SARS-CoV-2 B.1.617 by vaccine and convalescent serum. *Cell*. 2021.
- 640 57. Hadfield J, Megill C, Bell SM, Huddleston J, Potter B, Callender C, et al. Nextstrain: real-time tracking of  
641 pathogen evolution. *Bioinformatics*. 2018;34(23):4121-3.
- 642 58. Sagulenko P, Puller V, Neher RA. TreeTime: Maximum-likelihood phylodynamic analysis. *Virus Evol*.  
643 2018;4(1):vex042.
- 644 59. Gordon, D. E.; Jang, G. M.; Bouhaddou, M.; Xu, J.; Obernier, K.; White, K. M.; O'Meara, M. J.; Rezelj, V.  
645 V.; Guo, J. Z.; Swaney, D. L.; Tummino, T. A.; Huettenhain, R.; Kaake, R. M.; Richards, A. L.; Tutuncuoglu, B.;  
646 Foussard, H.; Batra, J.; Haas, K.; Modak, M.; Kim, M.; Haas, P.; Polacco, B. J.; Braberg, H.; Fabius, J. M.;  
647 Eckhardt, M.; Soucheray, M.; Bennett, M. J.; Cakir, M.; McGregor, M. J.; Li, Q.; Meyer, B.; Roesch, F.; Vallet, T.;  
648 Mac Kain, A.; Miorin, L.; Moreno, E.; Naing, Z. Z. C.; Zhou, Y.; Peng, S.; Shi, Y.; Zhang, Z.; Shen, W.; Kirby, I.  
649 T.; Melnyk, J. E.; Chorba, J. S.; Lou, K.; Dai, S. A.; Barrio-Hernandez, I.; Memon, D.; Hernandez-Armenta, C.;  
650 Lyu, J.; Mathy, C. J. P.; Perica, T.; Pilla, K. B.; Ganesan, S. J.; Saltzberg, D. J.; Rakesh, R.; Liu, X.; Rosenthal, S.  
651 B.; Calviello, L.; Venkataramanan, S.; Liboy-Lugo, J.; Lin, Y.; Huang, X. P.; Liu, Y.; Wankowicz, S. A.; Bohn, M.;  
652 Safari, M.; Ugur, F. S.; Koh, C.; Savar, N. S.; Tran, Q. D.; Shengjuler, D.; Fletcher, S. J.; O'Neal, M. C.; Cai, Y.;  
653 Chang, J. C. J.; Broadhurst, D. J.; Klippsten, S.; Sharp, P. P.; Wenzell, N. A.; Kuzuoglu, D.; Wang, H. Y.; Trenker,  
654 R.; Young, J. M.; Cavero, D. A.; Hiatt, J.; Roth, T. L.; Rathore, U.; Subramanian, A.; Noack, J.; Hubert, M.; Stroud,  
655 R. M.; Frankel, A. D.; Rosenberg, O. S.; Verba, K. A.; Agard, D. A.; Ott, M.; Emerman, M.; Jura, N.; von Zastrow,  
656 M.; Verdin, E.; Ashworth, A.; Schwartz, O.; d'Enfert, C.; Mukherjee, S.; Jacobson, M.; Malik, H. S.; Fujimori, D.  
657 G.; Ideker, T.; Craik, C. S.; Floor, S. N.; Fraser, J. S.; Gross, J. D.; Sali, A.; Roth, B. L.; Ruggero, D.; Taunton, J.;  
658 Kortemme, T.; Beltrao, P.; Vignuzzi, M.; Garcia-Sastre, A.; Shokat, K. M.; Shoichet, B. K.; Krogan, N. J., A SARS-  
659 CoV-2 protein interaction map reveals targets for drug repurposing. *Nature* 2020.
- 660 60. Kyle, J. E.; Crowell, K. L.; Casey, C. P.; Fujimoto, G. M.; Kim, S.; Dautel, S. E.; Smith, R. D.; Payne, S.  
661 H.; Metz, T. O., LIQUID: an-open source software for identifying lipids in LC-MS/MS-based lipidomics data. *Bio-*  
662 *informatics* 2017, 33 (11), 1744-1746.
- 663 61. Pluskal, T.; Castillo, S.; Villar-Briones, A.; Orešič, M., MZmine 2: Modular framework for processing, vis-  
664 ualizing, and analyzing mass spectrometry-based molecular profile data. *BMC Bioinformatics* **2010**, *11* (395), 1-11.
- 665 62. Benjamini, Y.; Hochberg, Y., Controlling the False Discovery Rate: A Practical and Powerful Approach to  
666 Multiple Testing. *Journal of the Royal Statistical Society: Series B (Methodological)* 1995, *57*, 289-300.
- 667 63. McQuin, C.; Goodman, A.; Chernyshev, V.; Kametsky, L.; Cimini, B. A.; Karhohs, K. W.; Doan, M.;  
668 Ding, L.; Rafelski, S. M.; Thirstrup, D.; Wiegraebe, W.; Singh, S.; Becker, T.; Caicedo, J. C.; Carpenter, A. E., Cell-  
669 Profiler 3.0: Next-generation image processing for biology. *PLoS Biol* **2018**, *16* (7), e2005970.
- 670 64. Schindelin, J.; Arganda-Carreras, I.; Frise, E.; Kaynig, V.; Longair, M.; Pietzsch, T.; Preibisch, S.; Rueden,  
671 C.; Saalfeld, S.; Schmid, B.; Tinevez, J. Y.; White, D. J.; Hartenstein, V.; Eliceiri, K.; Tomancak, P.; Cardona, A.,  
672 Fiji: an open-source platform for biological-image analysis. *Nat Methods* **2012**, *9* (7), 676-82.
- 673 65. Kumar, P.; Nagarajan, A.; Uchil, P. D., Analysis of Cell Viability by the alamarBlue Assay. *Cold Spring*  
674 *Harb Protoc* **2018**, 2018 (6).
- 675 66. Crawford, K. H. D.; Eguia, R.; Dingens, A. S.; Loes, A. N.; Malone, K. D.; Wolf, C. R.; Chu, H. Y.; Tor-  
676 torici, M. A.; Veessler, D.; Murphy, M.; Pettie, D.; King, N. P.; Balazs, A. B.; Bloom, J. D., Protocol and Reagents  
677 for Pseudotyping Lentiviral Particles with SARS-CoV-2 Spike Protein for Neutralization Assays. *Viruses* **2020**, *12*  
678 (5).
- 679 67. Katzelnick, L. C.; Coello Escoto, A.; McElvany, B. D.; Chavez, C.; Salje, H.; Luo, W.; Rodriguez-Bar-  
680 raquer, I.; Jarman, R.; Durbin, A. P.; Diehl, S. A.; Smith, D. J.; Whitehead, S. S.; Cummings, D. A. T., Viridot: An  
681 automated virus plaque (immunofocus) counter for the measurement of serological neutralizing responses with ap-  
682 plication to dengue virus. *PLoS Negl Trop Dis* **2018**, *12* (10), e0006862.
- 683 68. Hadfield, J.; Megill, C.; Bell, S. M.; Huddleston, J.; Potter, B.; Callender, C.; Sagulenko, P.; Bedford, T.;  
684 Neher, R. A., Nextstrain: real-time tracking of pathogen evolution. *Bioinformatics* **2018**, *34* (23), 4121-4123.

685 69. Sagulenko, P.; Puller, V.; Neher, R. A., TreeTime: Maximum-likelihood phylodynamic analysis. *Virus*  
686 *Evol* **2018**, *4* (1), vex042.  
687

688

689 **Acknowledgments:** This work was supported by the National Institutes of Health  
690 (1R01AI141549) and the Pulmonary & Critical Care training grant, “Multidisciplinary Research  
691 Training in Pulmonary Medicine” (T32HL083808). Lipidomics analyses were performed in the  
692 Environmental Molecular Sciences Laboratory, a national scientific user facility sponsored by  
693 the Department of Energy (DOE) Office of Biological and Environmental Research located at  
694 the Pacific Northwest National Laboratory (PNNL). PNNL is a multiprogram national laboratory  
695 operated by Battelle for the DOE under Contract DE-AC05-76RLO 1830. J.E.K and L.M.B  
696 were supported by Laboratory Directed Research and Development Program at PNNL, and the  
697 National Institute of Environmental Health Sciences grant U2CES030170. PNNL is a multipro-  
698 gram national laboratory operated by Battelle for the U.S. Department of Energy under contract  
699 DE-AC05-76RLO 1830.

700 **Author contributions:** Author contributions Conceptualization: FGT, SEF, JEK, and HCL;  
701 Methodology, formal analysis, and investigation: SEF, JEK, HCL, TAB, JW, LMB; Writing —  
702 original draft: SEF; Writing — review and editing: all authors; Visualization: SEF and J-YL; Su-  
703 pervision: FGT; Project administration: FGT; Fund acquisition: FGT, CS, JEK, and TOM.

704 **Competing interests:** The authors declare no competing interests

705 **Materials & Correspondence:** Correspondence and material requests should be addressed to  
706 Dr. Fikadu Tafesse ([tafesse@ohsu.edu](mailto:tafesse@ohsu.edu)).

707



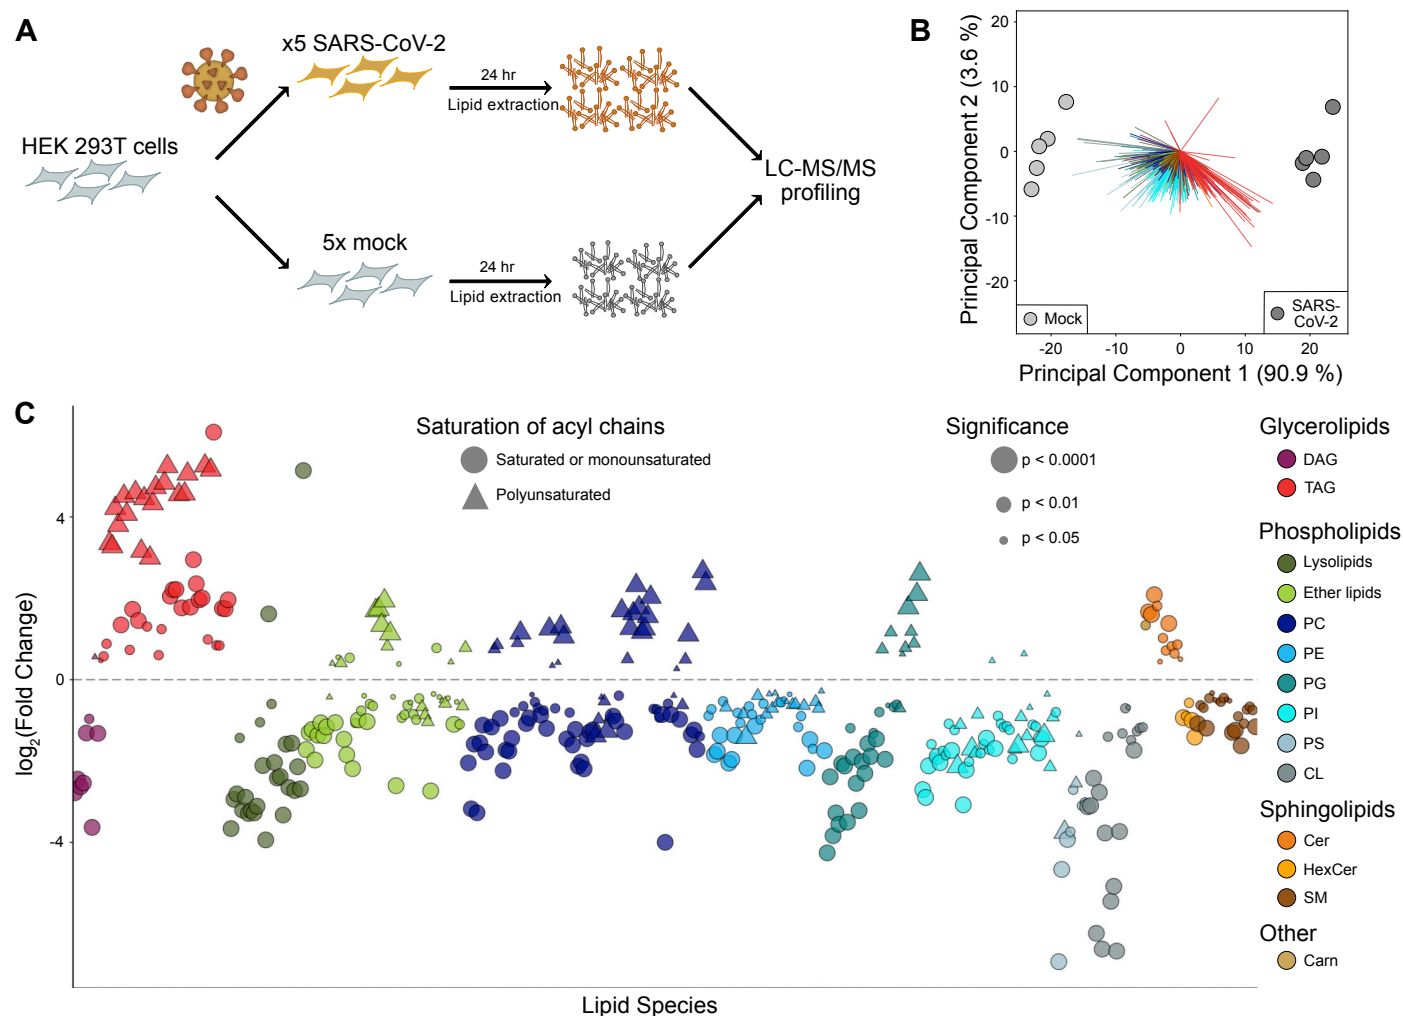

**Fig. 1. SARS-CoV-2 alters the lipid composition of its host cells** (A) Lipidomics study design. Each condition (SARS-CoV-2 infected or mock-infected HEK293T-ACE2 cells) is repeated in biological quintuplicate, and after 24 hours, cellular lipids are extracted and characterized by LC-MS/MS. (B) Principal component analysis of cells infected with SARS-CoV-2 or mock-infected. (n = 5 biological replicates, each point represents one biological replicate). (C) Individual lipid species characterized by abundance in SARS-CoV-2 infection relative to mock. Only significantly changed (p < 0.05, ANOVA, with Benjamini-Hochmimi adjustment for multiple comparisons) lipids are shown. Log<sub>2</sub>(Fold Change) relative to mock infection is shown on the x-axis. Individual lipid species are colored by the class of lipid that they belong to. DAG = diacylglycerol; TAG = triacylglycerol; PC = phosphatidylcholine; PE = phosphatidylethanolamine; PG = phosphatidylglycerol; PI = phosphatidylinositol; PS = phosphatidylserine; CL = cardiolipin; Cer = ceramide; HexCer = hexosylceramide; SM = sphingomyelin; Carn = acylcarnitine.

### A. SARS-CoV-2 open reading frames

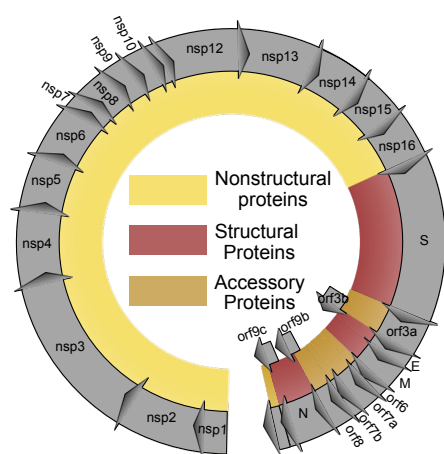

### B. Putative protein functions

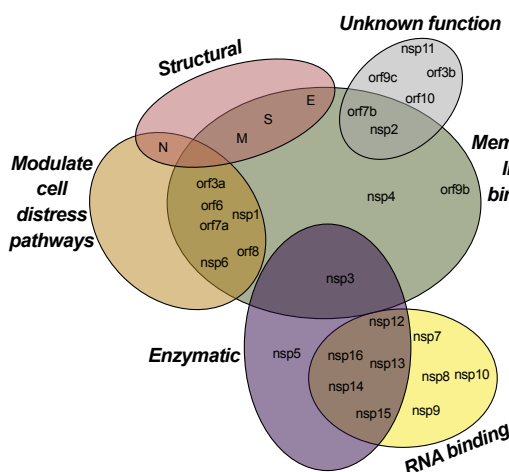

### C. Experimental design

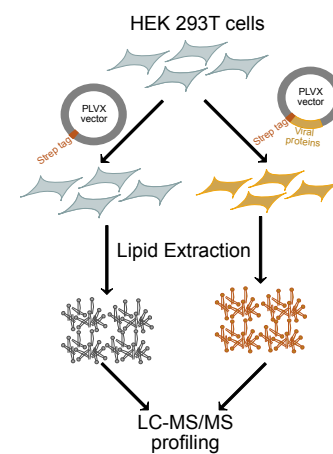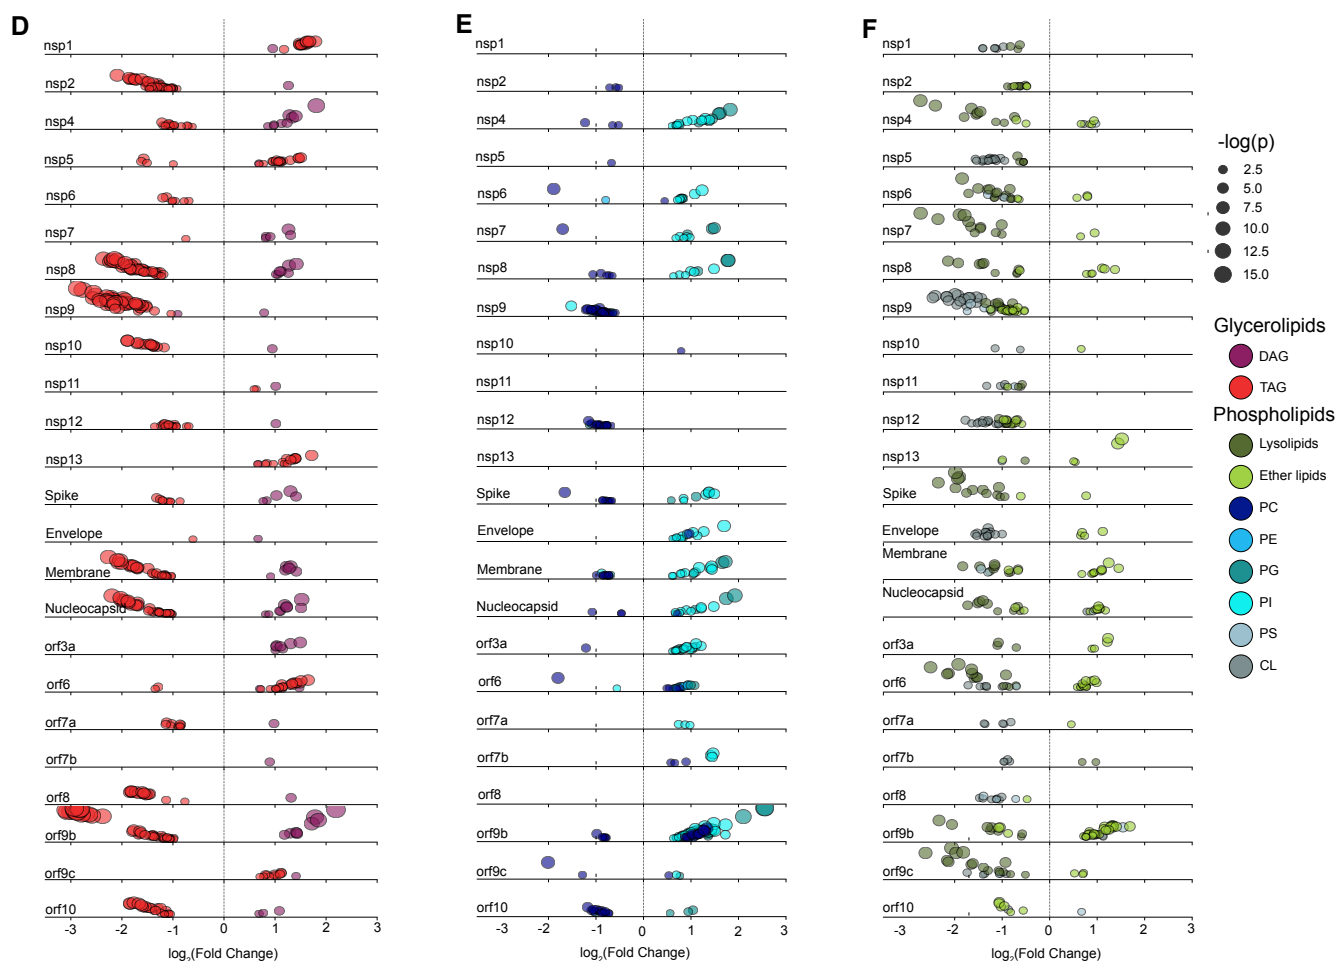

**Fig. 2. Ectopic expression of SARS-CoV-2 proteins modulates host lipid metabolism (A)** Open reading frames of the SARS-CoV-2 genome **(B)** Putative functions of SARS-CoV-2 proteins, based on early studies and sequence similarity to proteins from SARS-CoV. **(C)** Lipidomics study design. Each protein is transfected into HEK293T cells in biological quintuplicate, and after 48 hours, cellular lipids are extracted and characterized by LC-MS/MS. **(D-F)** Individual lipid species characterized by class and family. Only significantly changed ( $p < 0.05$ , ANOVA, Benjamini-Hochmimi adjusted for multiple comparison) lipids are shown.  $\log_2(\text{Fold Change})$  relative to empty vector is shown on the x-axis. Individual lipid species are colored by the class of lipid that they belong to. Abbreviations same as Figure 1.

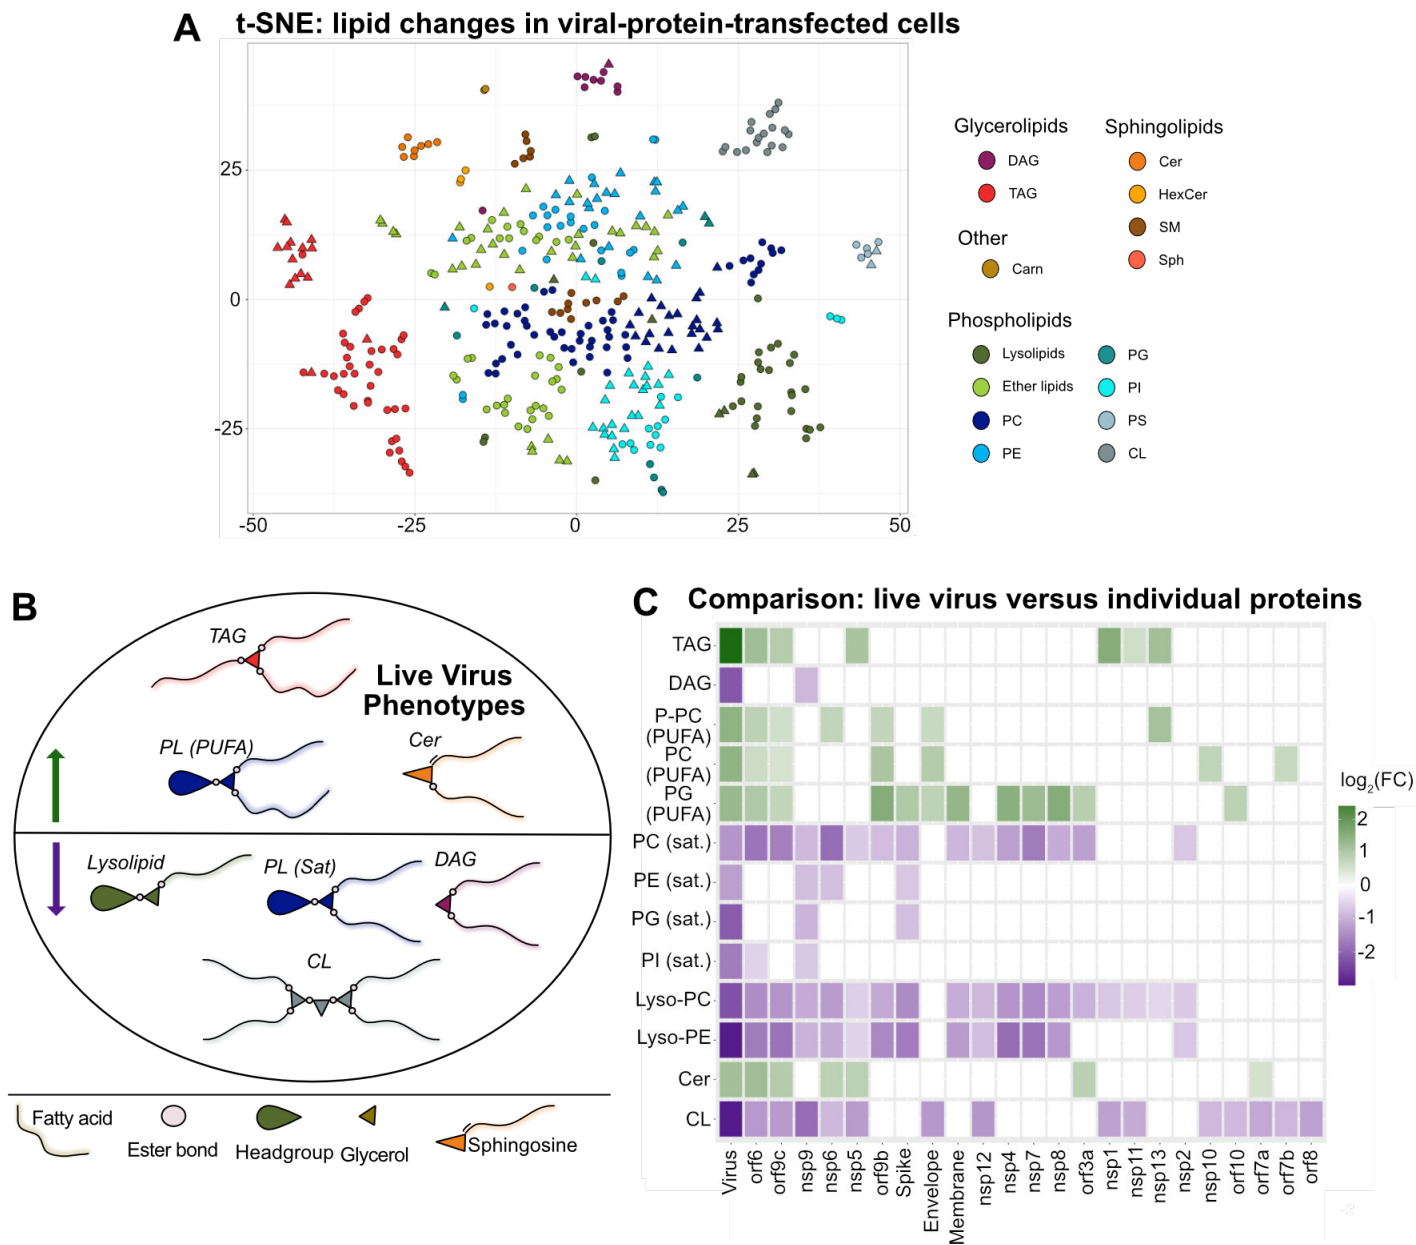

**Fig. 3 Individual SARS-CoV-2 proteins recapitulate overlapping lipid features of live infection (A)** Unsupervised clustering of the normalized lipid species observed in the protein-transfected dataset by t-SNE. Abbreviations same as Figure 1. **(B)** Summary of lipids altered upon infection with SARS-CoV-2. Cer = ceramide; PL (PUFA) = phospholipids bearing polyunsaturated acyl chains; TAG = triacylglycerol; PL (Sat) = phospholipids bearing saturated or monounsaturated acyl chains; CL = cardiolipin **(C)** Average fold change within each class described above in each condition, both live virus infection and ectopic protein expression. Only significantly changed ( $p < 0.05$ , see Fig 1 and Fig 2 for descriptions of statistical tests in the live virus and transfection conditions, respectively) lipid species were used in this calculation.

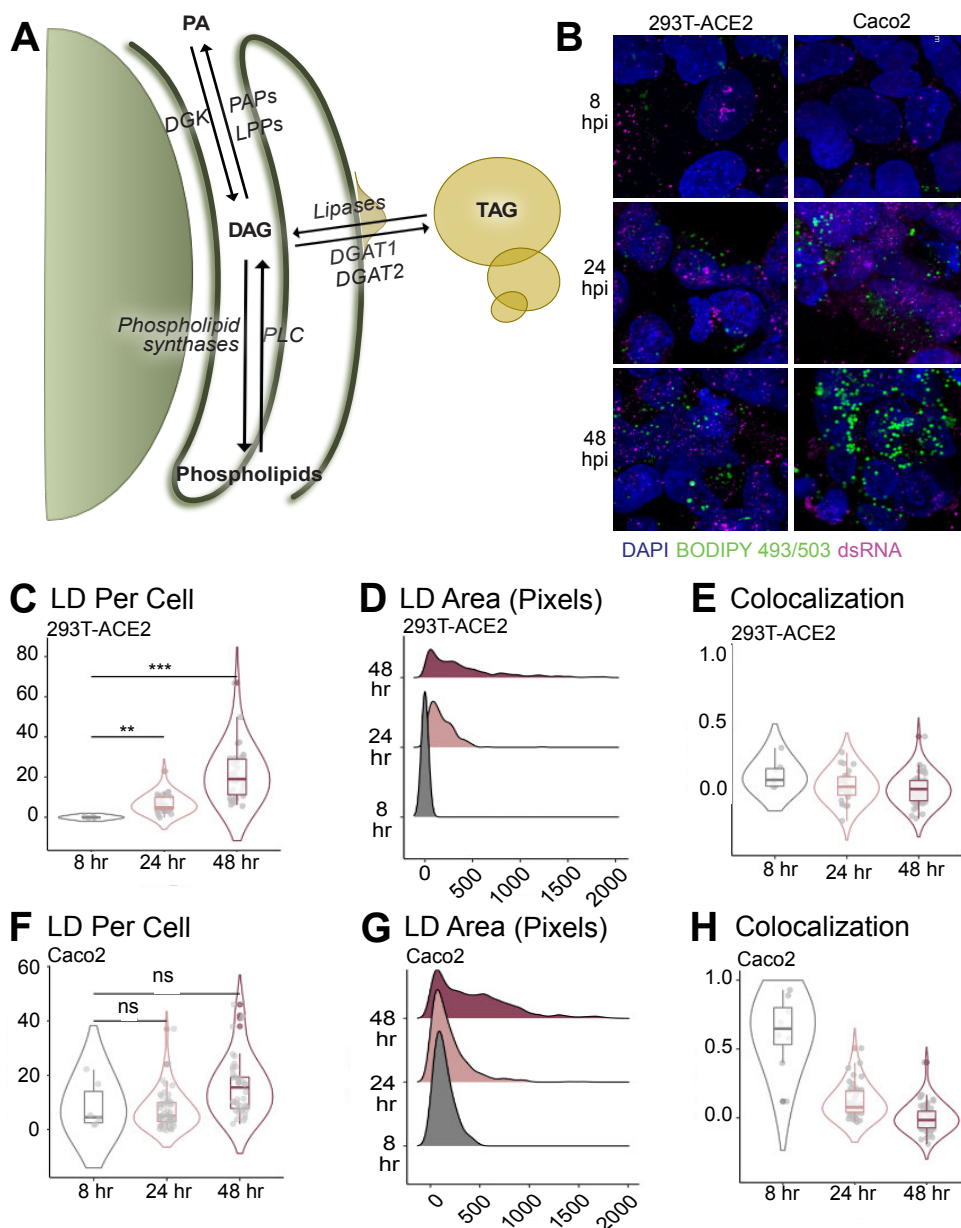

**Fig. 4 Lipid droplets are induced following SARS-CoV-2 infection and after the transfection of key viral proteins** (A) Overview of central glycerolipid metabolism. PA = phosphatidic acid; PAP = phosphatidic acid phosphatase; LPP = lysophosphatidic acid phosphatase; DGK: diacylglycerol kinase; DAG = diacylglycerol; TAG = triacylglycerol; DGAT 1/2 = diacylglycerol acetyltransferase 1/2; PLC = phospholipase C. (B) 293T-ACE2 and Caco-2 cells infected with SARS-CoV-2 strain USA-WA1/2020 (MOI = 1) and fixed at the indicated timepoints. LDs and infected cells were visualized with BODIPY 493/503 and anti-dsRNA immunofluorescence, respectively. Images are representative of three independent experiments. (C & F) Number of lipid droplets per cell; each data point is a cell. \* $p \leq 0.05$ , \*\* $p \leq 0.01$ , \*\*\* $p \leq 0.001$ , \*\*\*\* $p < 0.0001$ , one-way ANOVA. (D & G) Distribution of the area of each lipid droplet, in pixels. (E & H) Colocalization of dsRNA and BODIPY by Pearson's coefficient. Each data point is a cell. \* $p \leq 0.05$ , \*\* $p \leq 0.01$ , \*\*\* $p \leq 0.001$ , \*\*\*\* $p < 0.0001$ , one-way ANOVA.

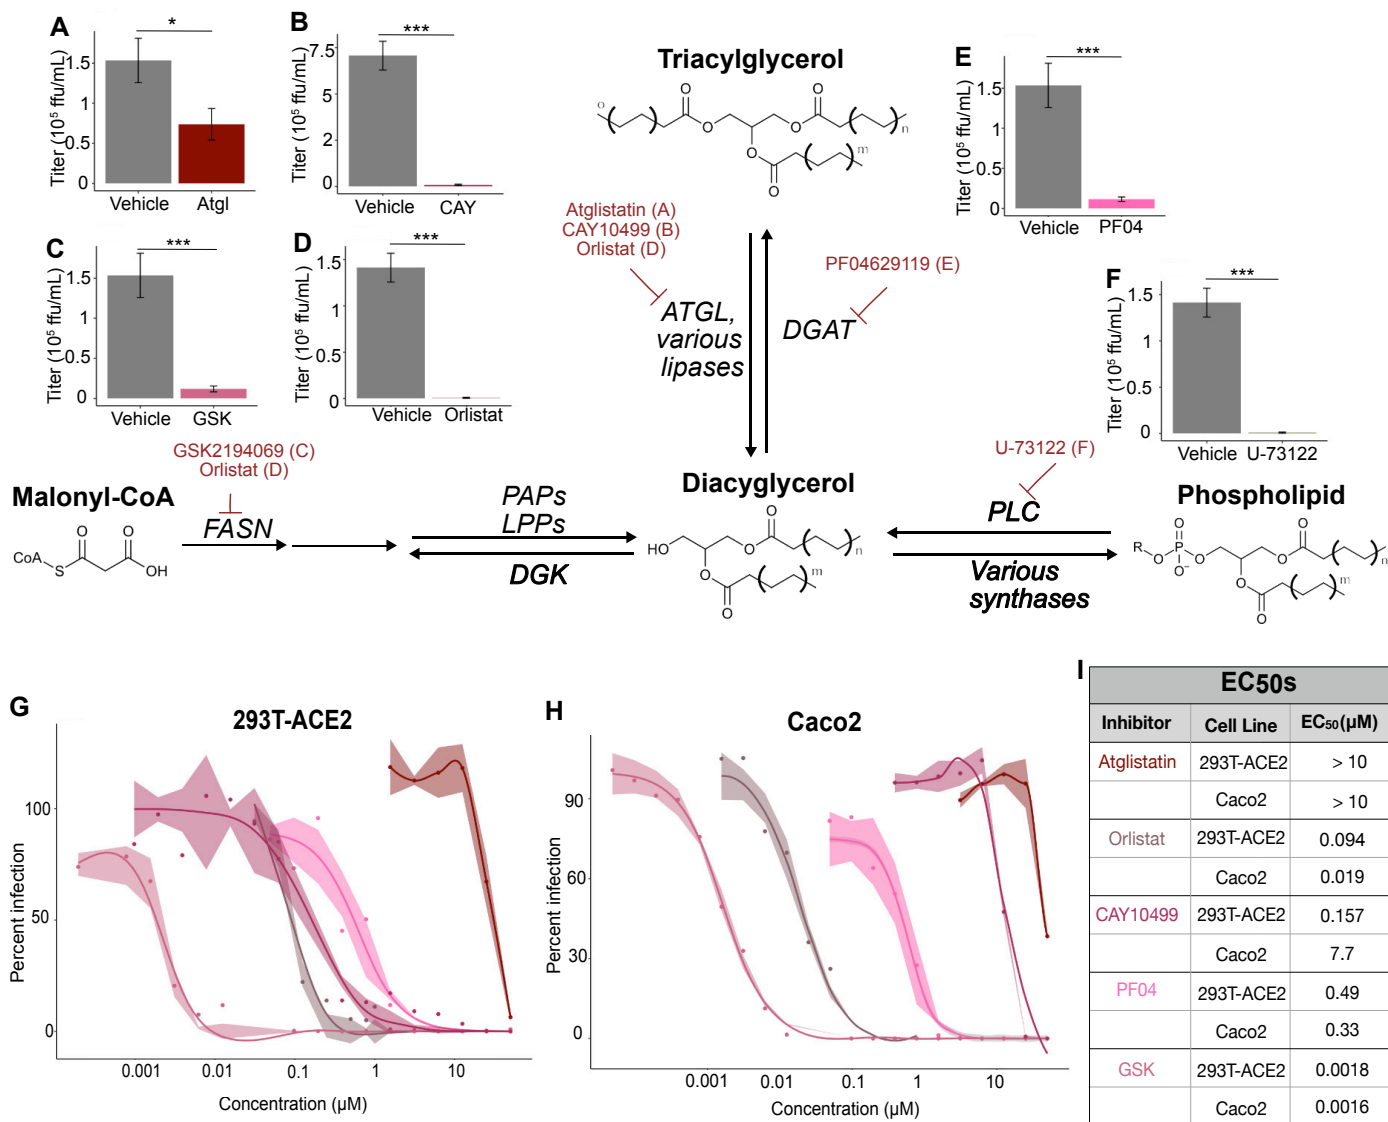

**Fig 5. Central glycerolipid metabolism is essential for SARS-CoV-2 infection (A-F)** Screen of neutral lipid biosynthesis inhibitors. HEK-293T-ACE2 cells were treated with 10  $\mu$ M of each compound overnight prior to infection. Cells were infected for 48 hours prior to supernatant collection and focus forming assay. Bars represent viral titers from cells treated with the indicated inhibitors, measured by focus forming assay. Data are mean  $\pm$  SE; \* $p \leq 0.05$ , \*\* $p \leq 0.01$ , \*\*\* $p \leq 0.001$ , \*\*\*\* $p < 0.0001$ , one-way ANOVA. Data are from three independent experiments. FASN = fatty acid synthase; PAP = phosphatidic acid phosphatase; LPP = lipid phosphate phosphatase; DGK = diacylglycerol kinase; ATGL = adipose triacylglycerol lipase; DGAT = diacylglycerol acetyltransferase; PLC = phospholipase C (**G**) EC<sub>50</sub> curves for selected inhibitors in 293T-ACE2 cells. HEK-293T-ACE2 cells were treated with 2-fold dilutions of each compound overnight prior to infection. Cells were infected for 48 hours prior to supernatant collection and focus forming assay. Percent infection is calculated as [Titer(inhibitor) / Titer(vehicle)]\*100. Data are from three independent experiments. Shadow is SE. Curve fits are calculated using a nonlinear curve fit to the Hill equation: Response = (Max Response)/(1 + [EC<sub>50</sub>/Concentration]<sup>n</sup>), where the max response is defined as 100% inhibition. (**H**) EC<sub>50</sub> curves for selected inhibitors in Caco2 cells. Experiment and analysis same as described in (**G**) (**I**) EC<sub>50</sub> values from the curves in **G** and **H**. EC<sub>50</sub> values are calculated from the curve fit described above.

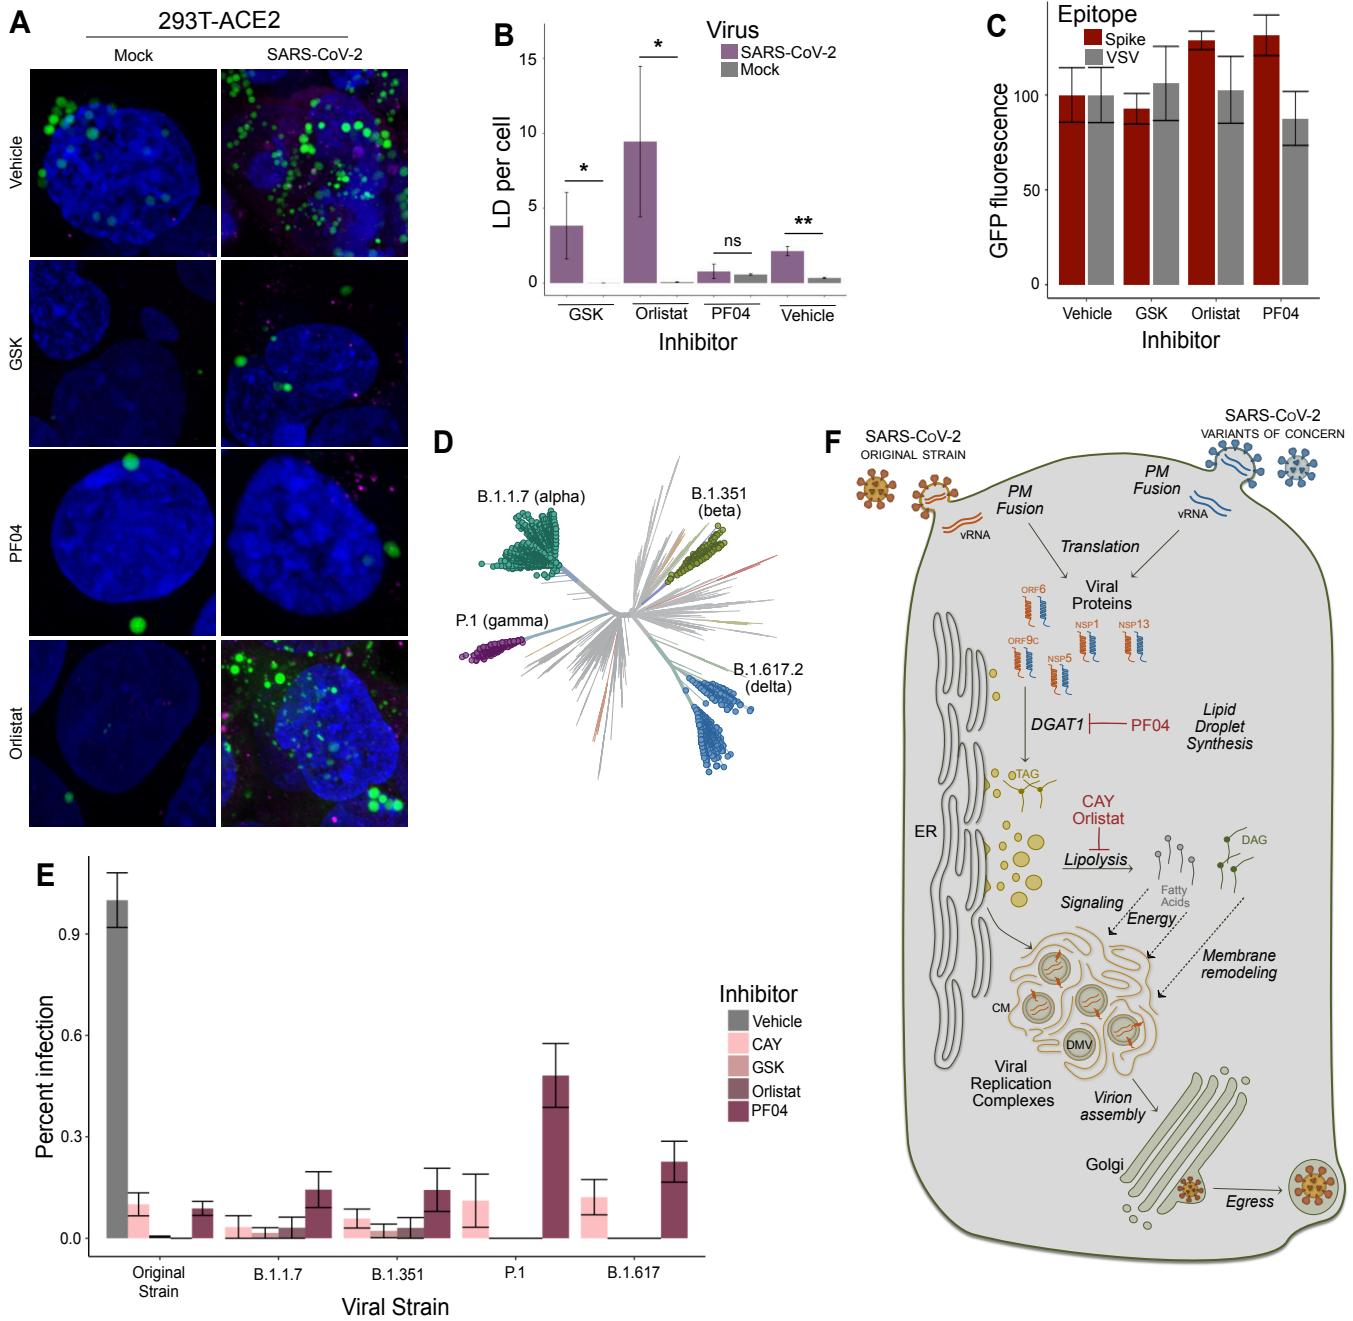

**Fig 6 Mechanisms and breadth of glycerolipid inhibition against SARS-CoV-2 (A)**

Representative images of HEK293T-ACE2 cells treated with each indicated inhibitor (10  $\mu$ M) or vehicle (DMSO), infected with SARS-CoV-2 (MOI = 1), and stained to visualize lipid droplets (BODIPY 493/503), and dsRNA. Images are representative of three independent experiments. **(B)** Quantification of lipid droplet numbers in (A). Data are mean  $\pm$  SE; \*  $p < 0.05$ , \*\*  $p < 0.01$ , \*\*\*  $< 0.001$ , one-way ANOVA **(C)** GFP fluorescence resulting from an infection with lentivirus pseudotyped with either SARS-CoV-2 Spike protein or VSV G protein. Estimated area of DAPI and GFP fluorescent pixels was calculated with built-in BZ-X software (Keyence) and GFP fluorescence was normalized to the DAPI signal for each condition. There were five biological replicates for each condition, and the biggest outlier was removed from analysis due to inherent variability in the assay. Data are mean  $\pm$  SD. **(D)** A model for neutral lipid flux during SARS-CoV-2 infection. All SARS-CoV-2 genomes enter the cytosol (shown here by direct fusion with the plasma membrane; endosomal entry has also been reported, especially in Vero E6 cells, but is thought to be less physiologically relevant to human infection). Viral proteins are expressed by host metabolic machinery; orf6, orf9c, nsp1, nsp5, and nsp13 all directly induce TAG formation via DGAT1, which is inhibited by PF04620110. Lipid droplets proliferate following infection, and are also sources for raw lipid material released by lipolysis, which is inhibited by CAY10499 and orlistat. These raw materials may be sources of energy, signaling mediators, and lipids for the creation of viral replication complexes. Assembled virions are trafficked through the Golgi and released from the cell by lysosomal exocytosis. **(E)** Unrooted phylogenetic tree of SARS-CoV-2 variants of concern, generated by Nextstrain (68,69), an open-source repository of pathogen genomic data. **(F)** Inhibition of the original strain and four variants of concern of SARS-CoV-2 in 293T-ACE2 cells by four inhibitors of glycerolipid biosynthesis, each at 10  $\mu$ M overnight prior to an 48-hour infection. Data are from three independent experiments; data are mean  $\pm$  SE.
