# Supplementary material for: A global lipid map reveals host dependency factors conserved across SARS-CoV-2 variants
Source: bioRxiv or medRxiv preprint supplement (doi:10.1101/2022.02.14.480430), 2022-02-15
Supplement: Supplementary file [file media-3.pdf]

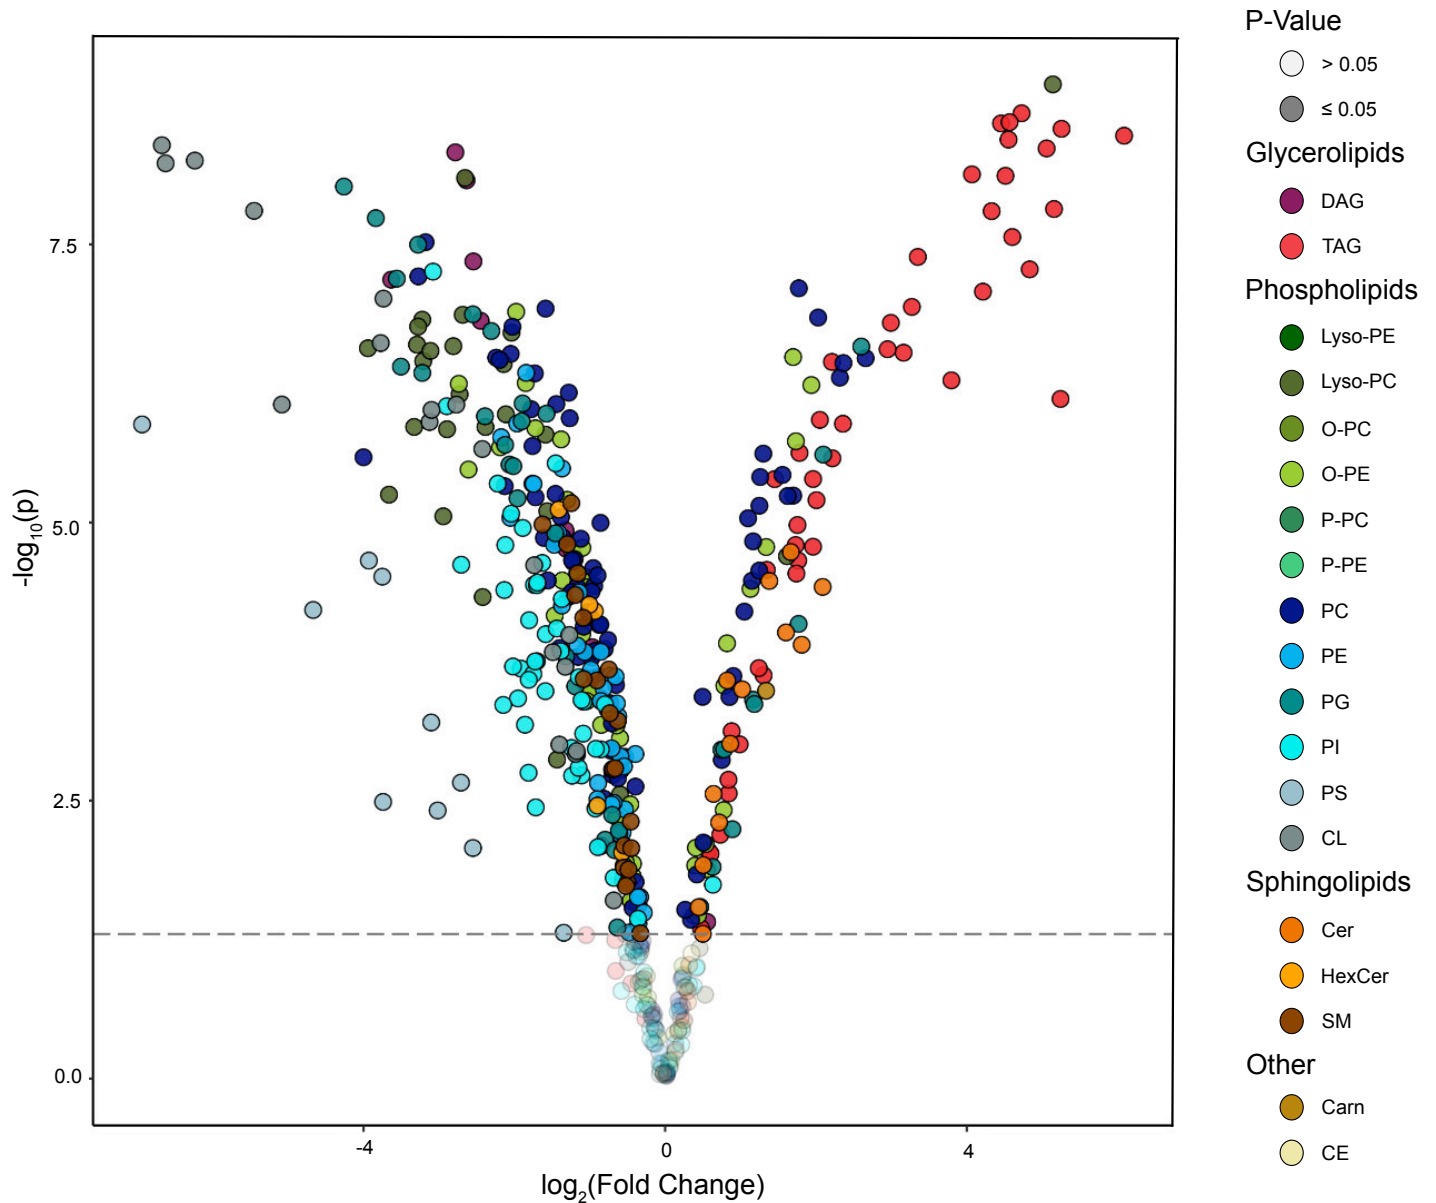

**Fig. S1.**

Volcano plot of individual lipid species detected by LC-ESI-MS/MS. Fold change is calculated relative to abundance in mock-infected controls. Lipid species are colored by class.

Abbreviations: DAG = diacylglycerol; TAG = triacylglycerol; Lyso-PC = lysophosphatidylcholine; Lyso-PE = lysophosphatidylethanolamine; O-PC = phosphatidylcholine (ether linked); O-PE = phosphatidylethanolamine (ether linked); P-PC = phosphatidylcholine (plasmalogen-linked); P-PE = phosphatidylethanolamine (plasmalogen-linked); PC = phosphatidylcholine; PE = phosphatidylethanolamine; PG = phosphatidylglycerol; PI = phosphatidylinositol; PS = phosphatidylserine; CL = cardiolipin; Cer = ceramide; HexCer = hexosylceramide; SM = sphingomyelin; Carn = acylcarnitine; CE = cholesterol ester

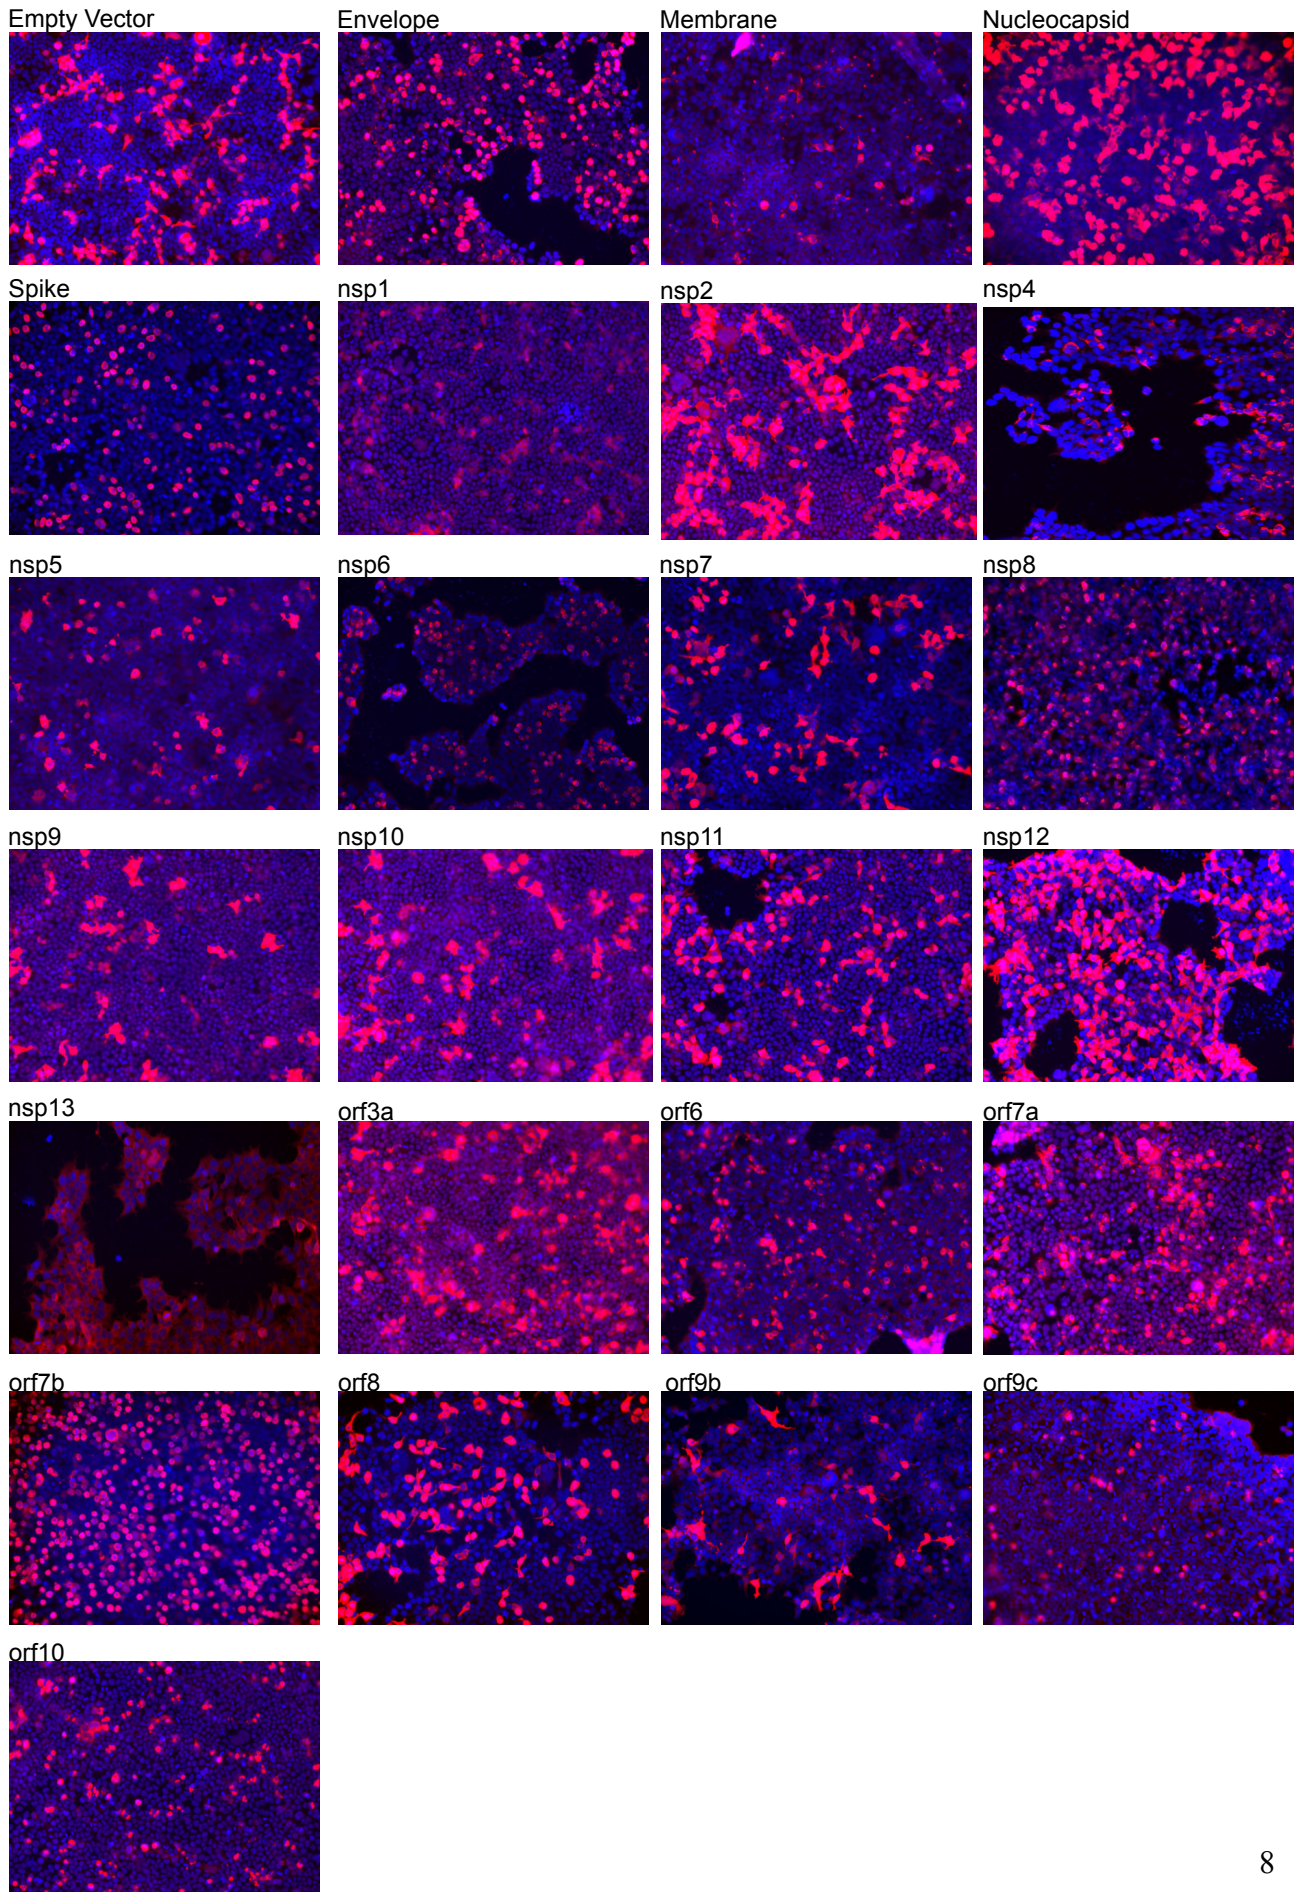

**Fig. S2.**

Images of HEK293T cells transfected with each viral protein taken on a BZ-X700 all-in-one fluorescent microscope (Keyence) at 20x resolution. Red is anti-Strep-tag immunostaining; blue is DAPI.

### Structural Proteins

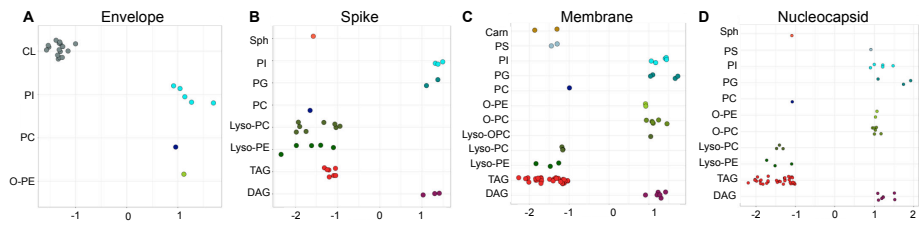

### RNA-Binding Proteins

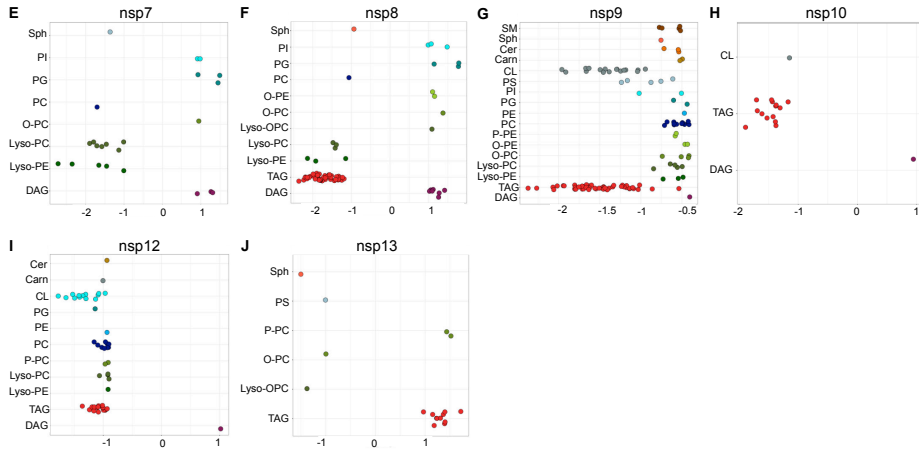

### Membrane-Binding Proteins

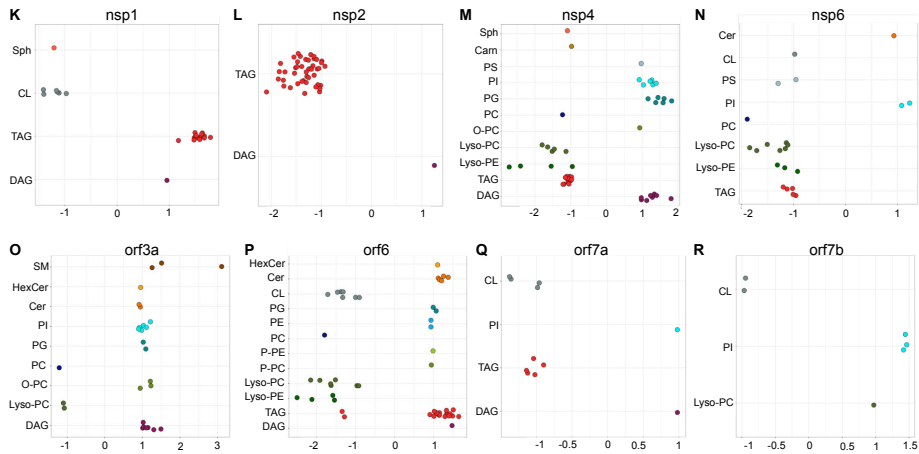

### Other

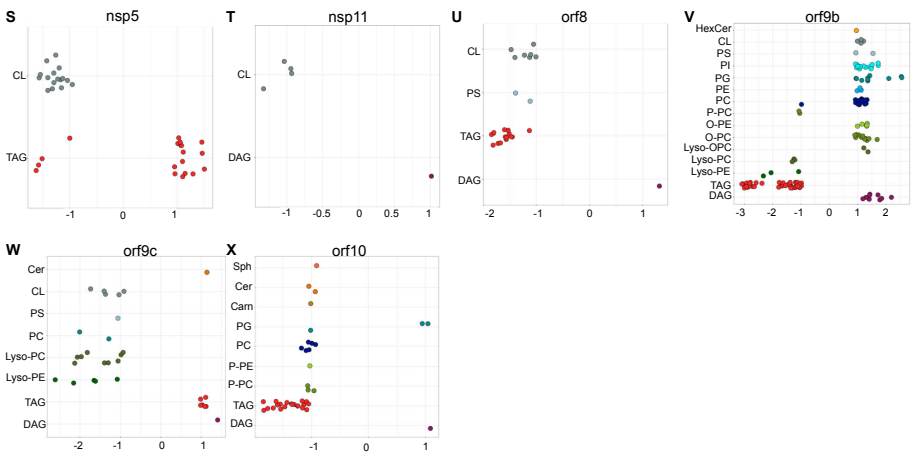

**Fig. S3.**

For each viral protein, the lipids that changed significantly relative to empty vector were selected. To identify the most influenced pathways, only lipids with a  $\log_2(\text{fold change})$  greater than 0.9 or less than -0.9 were plotted.  $\log_2(\text{fold change})$  relative to empty vector for each individual lipid species is shown.

(A-D) Structural proteins

(E-J) RNA-binding proteins

(K-R) Membrane-binding proteins

(S-X) Other proteins

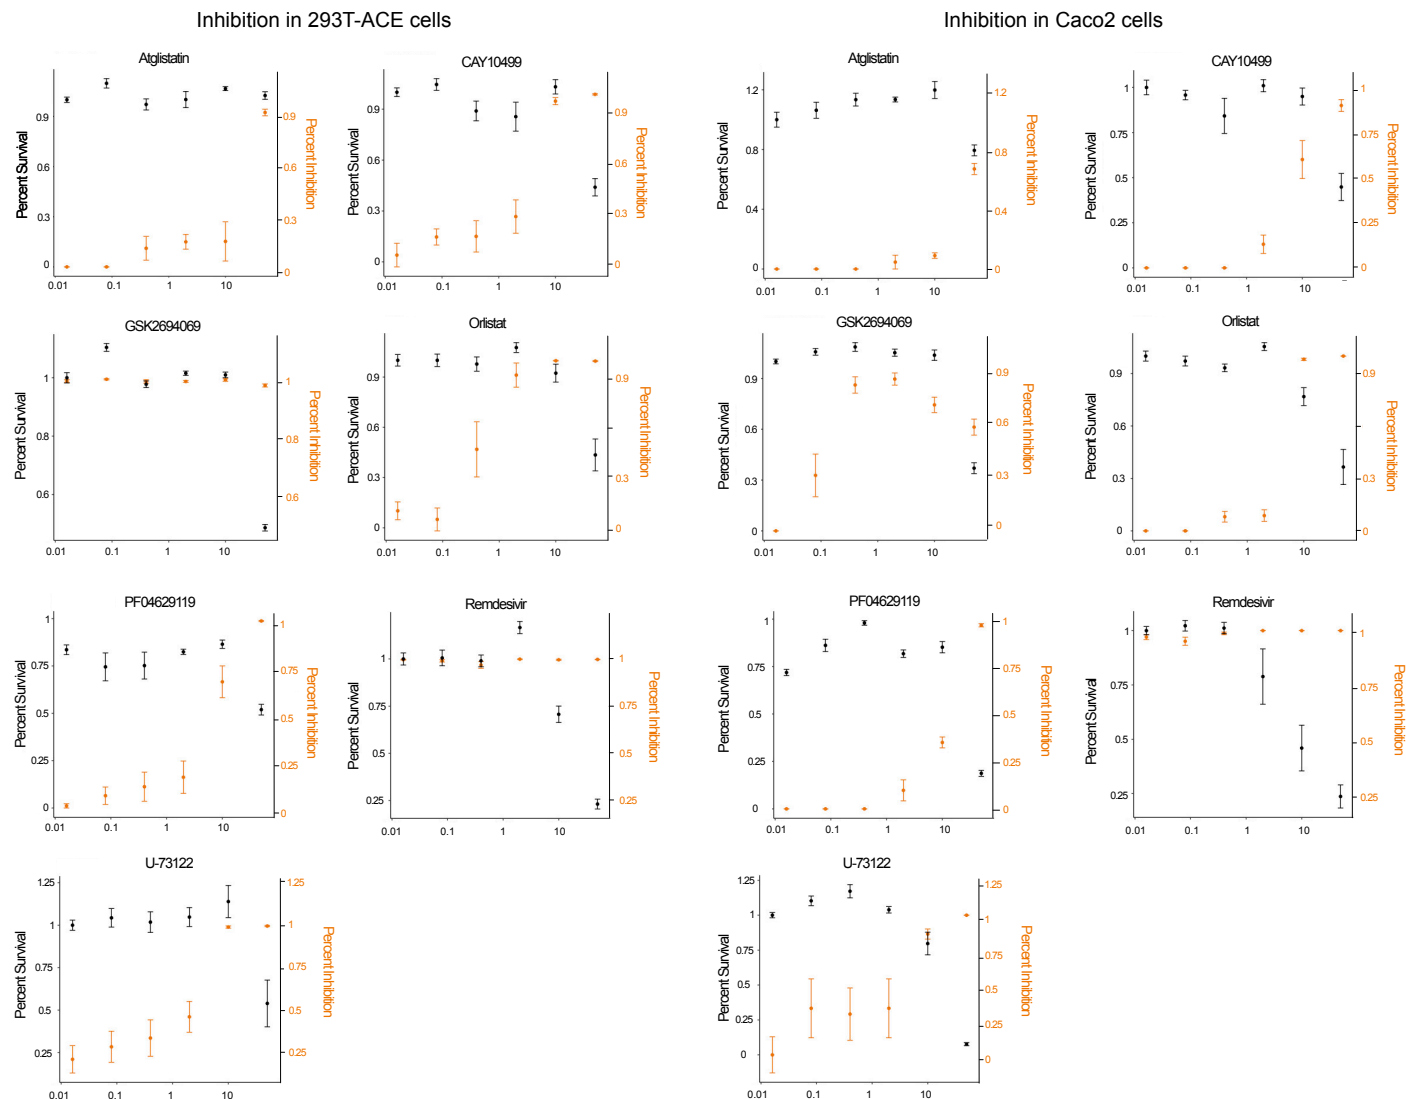

**Fig. S4.**

Percent inhibition/percent survival curves for each compound in 293T-Ace2 cells or Caco2 cells. Percent survival was calculated by dividing the resazurin fluorescence in drug-treated wells by the resazurin fluorescence in vehicle-treated wells. Percent inhibition was calculated by dividing the number of foci in drug-treated wells by the number of foci in vehicle-treated wells. Error bars represent standard error, calculated from three independent experiments.

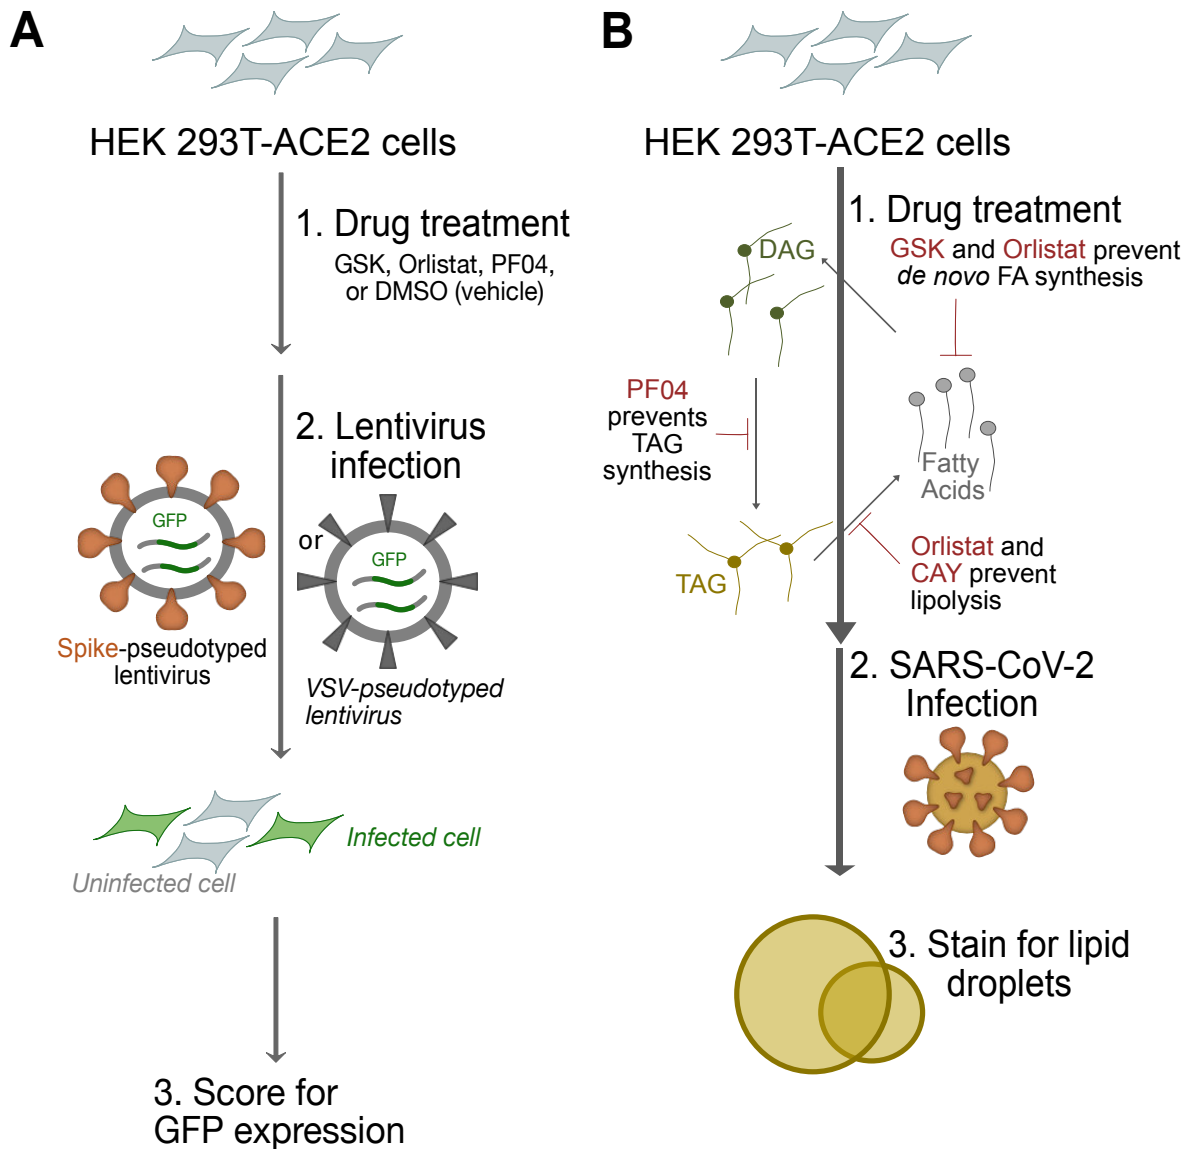

**Fig. S5.**

(A) Spike-mediated SARS-CoV-2 entry assay using Spike-pseudotyped lentivirus: experimental scheme. HEK293T-ACE2 cells are treated overnight with 10  $\mu$ M of selected inhibitors then infected with lentiviruses coated expressing the SARS-CoV-2 Spike protein (or the VSV G protein as a control) and bearing a GFP construct. Successfully infected cells express GFP; GFP fluorescence (normalized to DAPI) is used to quantify Spike-mediated viral uptake (B) Experimental design to test the effect of glycerolipid biosynthesis inhibition on SARS-CoV-2 induced lipid droplet formation. HEK293T-ACE2 cells were treated overnight with 10  $\mu$ M of selected inhibitors and then infected with SARS-CoV-2 (MOI = 1) and fixed after 48 hours. Lipid droplets and infected cells were visualized with BODIPY 493/503 and anti-dsRNA immunofluorescence, respectively.

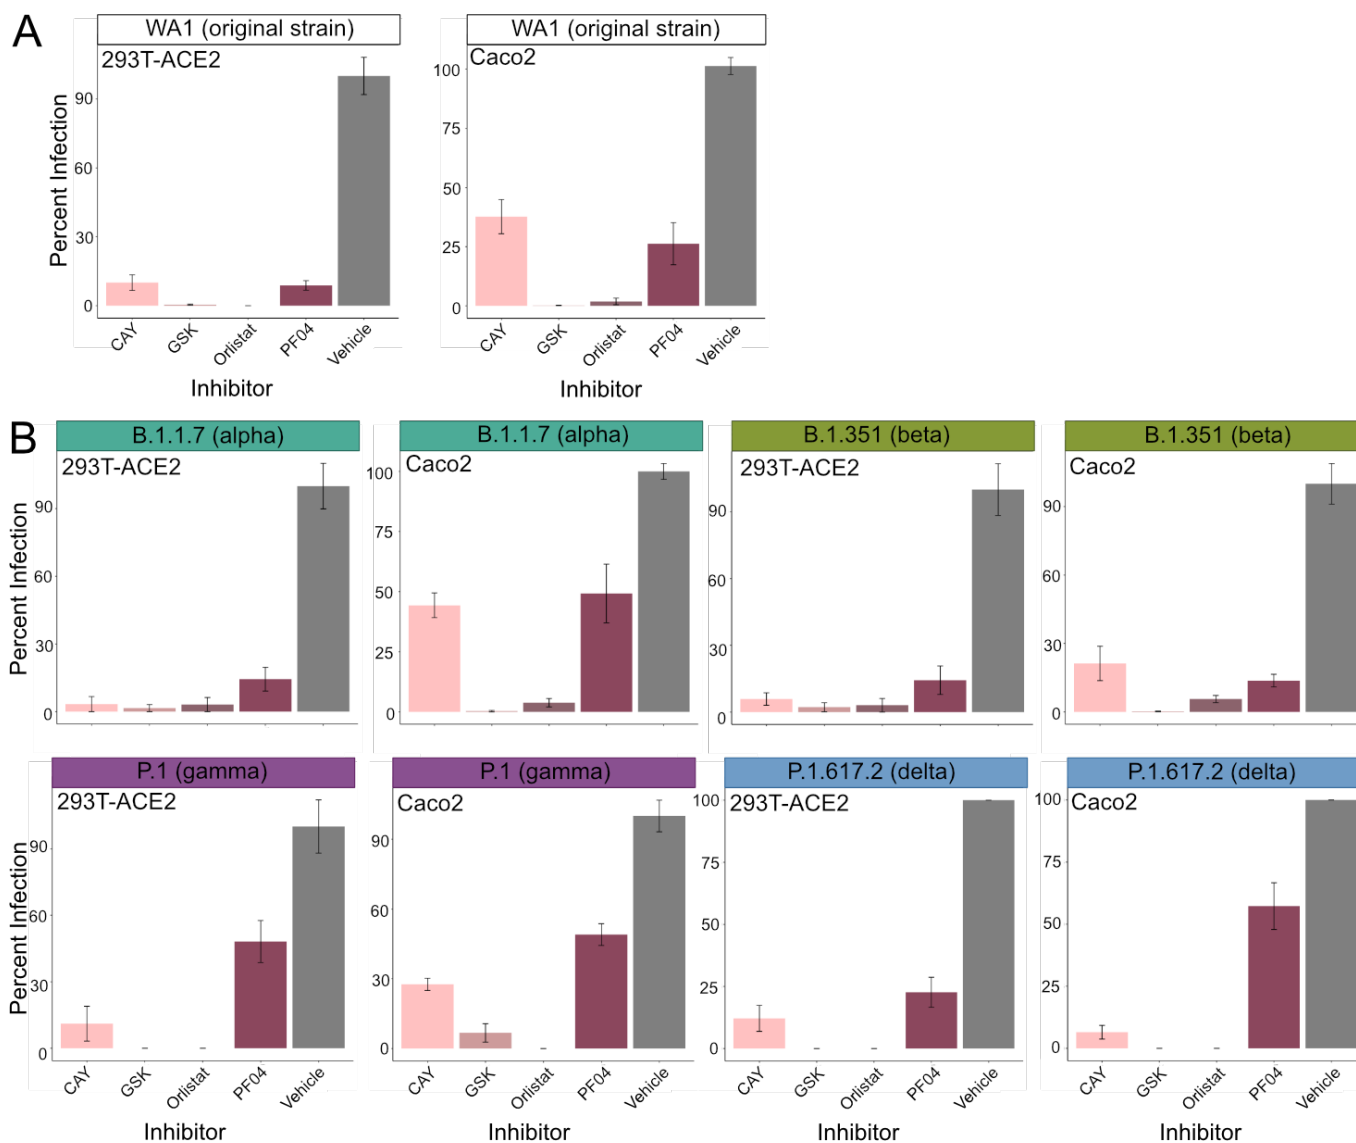

**Fig. S6.**

(A) Inhibition of the original SARS-CoV-2 strain by four inhibitors of glycerolipid biosynthesis, each at 10  $\mu$ M overnight prior to a 48-hour infection (MOI = 0.1). Data are from three independent experiments; data are mean  $\pm$  SE. (B) Inhibition of four variants of concern by four inhibitors of glycerolipid biosynthesis, each at 10  $\mu$ M overnight prior to a 48-hour infection (MOI = 0.1). Data are from three independent experiments; data are mean  $\pm$  SE.



| Viral Protein | Plasmid ID | Amount of DNA (μg) |
|---------------|------------|--------------------|
| nsp1          | A01        | 30                 |
| nsp2          | A02        | 30                 |
| nsp4          | A05        | 30                 |
| nsp5          | A06        | 30                 |
| nsp7          | A09        | 20                 |
| nsp8          | A10        | 30                 |
| nsp9          | A11        | 40                 |
| nsp10         | A12        | 35                 |
| nsp11         | B01        | 30                 |
| nsp12         | B02        | 45                 |
| nsp13         | B03        | 35                 |
| S             | B07        | 30                 |
| orf3a         | B08        | 30                 |
| E             | B10        | 30                 |
| M             | B11        | 20                 |
| orf6          | B12        | 35                 |
| orf7a         | C01        | 35                 |
| orf7b         | C02        | 30                 |
| orf8          | C03        | 30                 |
| N             | C04        | 10                 |
| orf9b         | C05        | 30                 |
| orf9c         | C06        | 35                 |
| orf10         | C07        | 45                 |
| Empty Vector  | PLVX       | 35                 |

**Table S1.**

Amounts of DNA used in viral protein transfection, related to Figure 2 and Figure S2.

**Data S1. (separate file)**

Fold changes and p-values for each lipid observed in the live virus infection experiment

**Data S2. (separate file)**

Fold changes and p-values for each lipid observed in the viral protein transfection experiment
